# Supplementary material for: Pantothenate biosynthesis is critical for chronic infection by the neurotropic parasite Toxoplasma gondii
Source: PubMed Central journal article supplement (PMC8764084; doi:10.1038/s41467-022-27996-4), 2022-01-17

## Supplementary Information File

Pantothenate biosynthesis is critical for chronic infection by the neurotropic  
parasite *Toxoplasma gondii*

Matteo Lunghi\*, Joachim Kloehn\*, Aarti Krishnan, Emmanuel Varesio, Oscar Vadas, and  
Dominique Soldati-Favre#

\* These authors contributed equally to the work

# Corresponding author: [Dominique.Soldati-Favre@unige.ch](mailto:Dominique.Soldati-Favre@unige.ch)

### **This pdf file includes:**

- Supplementary Figures 1 to 8
- Supplementary Table 1
- Supplementary Methods
- Raw blots and gels of Supplementary Figures

## Supplementary Figures

### Supplementary Fig. 1

**a** Cartoons representations and integration PCRs of PanK1 and PanK2 mAID-HA tagging constructs in Tir1 parasites. Expected base pairs, as well as numbered primers are indicated. **b** Western blot of IAA treated (hours indicated) PanK1-mAID-HA/PanK2-Ty strain (n = 3) or PanK2-mAID-HA/PanK1-Ty (n = 3), respectively. Antibodies anti HA and anti Ty for the detection of the tagged proteins, anti actin as loading control. **c** Cartoon representation and integration PCR for the PPCDC-mAID-HA tagging construct in Tir1 parasite. Expected base pairs, as well as numbered primers are indicated **d** Plaque assay of PPCDC-mAID-HA parasites in presence of IAA, with the supplementation of 250  $\mu$ M, 500  $\mu$ M. and 1 mM Pan, pantetheine (PanSH), or CoA (n =3). **e** Cartoon representation and integration PCR for the generation of DPCK-iKD parasites. Expected base pairs, as well as numbered primers are indicated. n number of independent biological replicates. Black asterisks indicate unspecific signal, red asterisks indicate degradation products of the tagged protein. 1Kb plus DNA ladder (Thermo 10787018) was used for all agarose gel electrophoresis. Black scale bar 1 mm. Source data are provided in the Supplementary File.

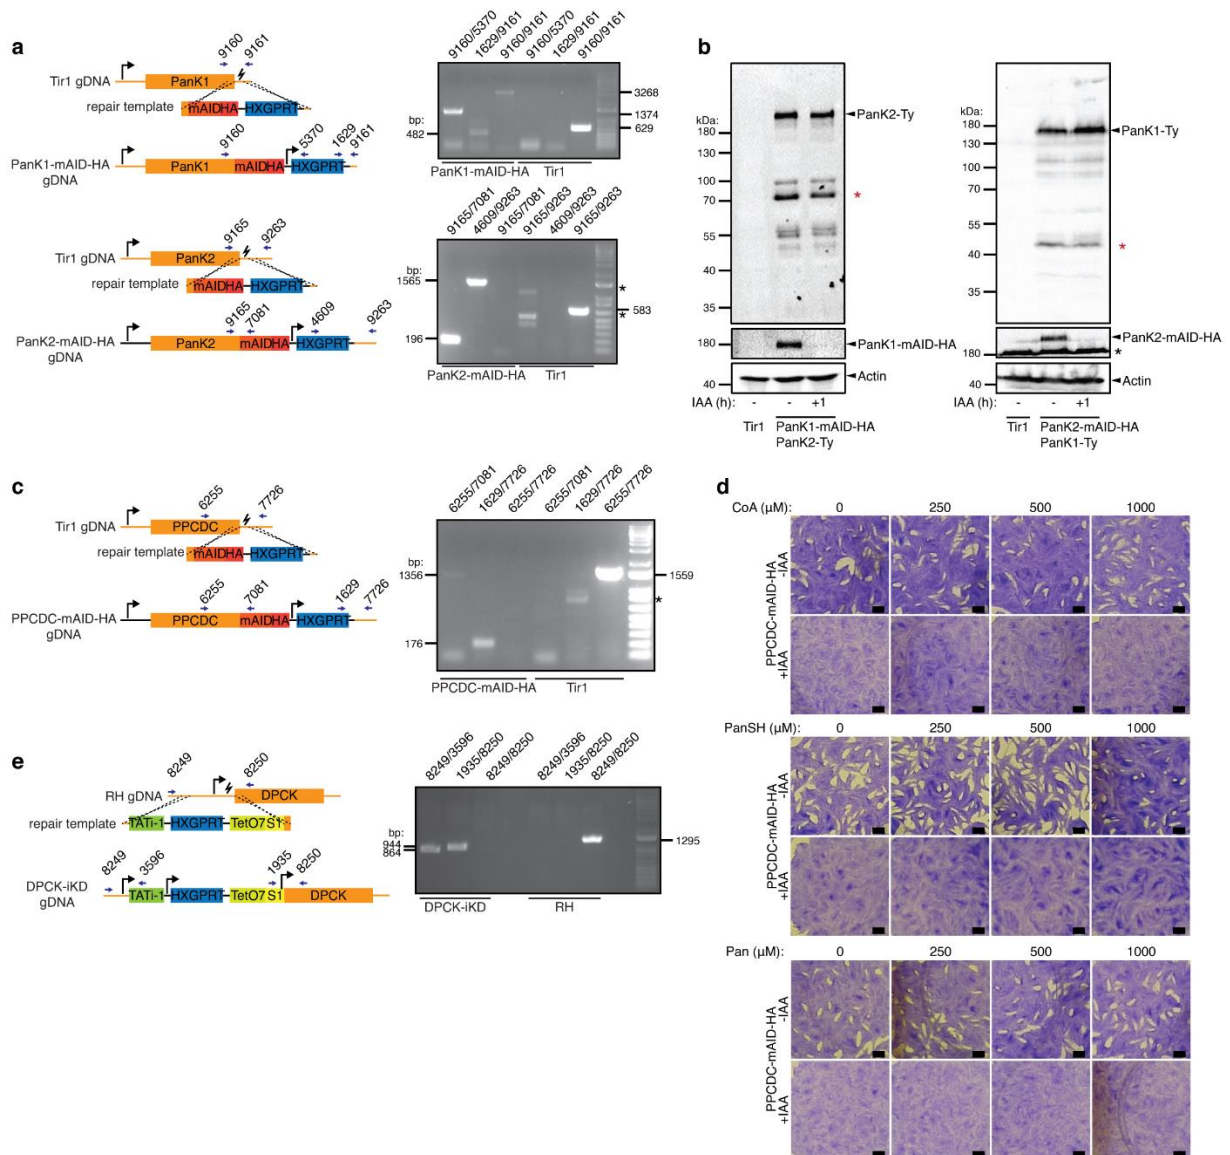

## Supplementary Fig. 2

**a** Cartoon representation and integration PCR for the knockout of *kphmt-kpr* and *pbal* genes, respectively, in RH parasites. Expected base pairs, as well as numbered primers are indicated, asterisks mark unspecific bands. **b** Fractional isotopologue distribution of a Pan fragment by GC-MS analysis ( $m/z$  201) in parasites cultured in regular medium or in medium –Pan supplemented with labeled  $^{13}\text{C}_5/^{15}\text{N}$ -Pan following correction for natural abundance ( $n = 3$ , mean and SD). 1Kb plus DNA ladder (Thermo 10787018) was used for all agarose gel electrophoresis. ). n number of independent biological replicates. Source data are provided in the Supplementary File.

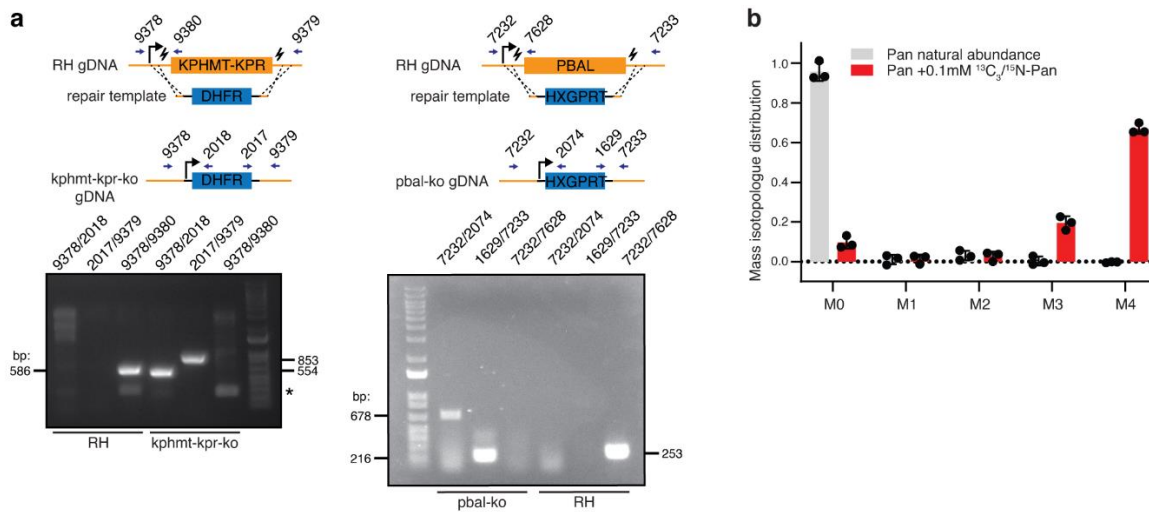

### Supplementary Fig. 3

GC-MS total ion chromatogram (TIC) of polar metabolites extracted from standard DMEM (upper panel), and custom-made Pan depleted DMEM, with dialyzed FBS (lower panel). Peak corresponding to Pan is highlighted and the selected ion chromatograms of its qualifier ions ( $m/z$  201, 291 and 420) are displayed in the insert panel. No TIC peaks or ions corresponding to Pan were detected in the -Pan medium (lower panel).

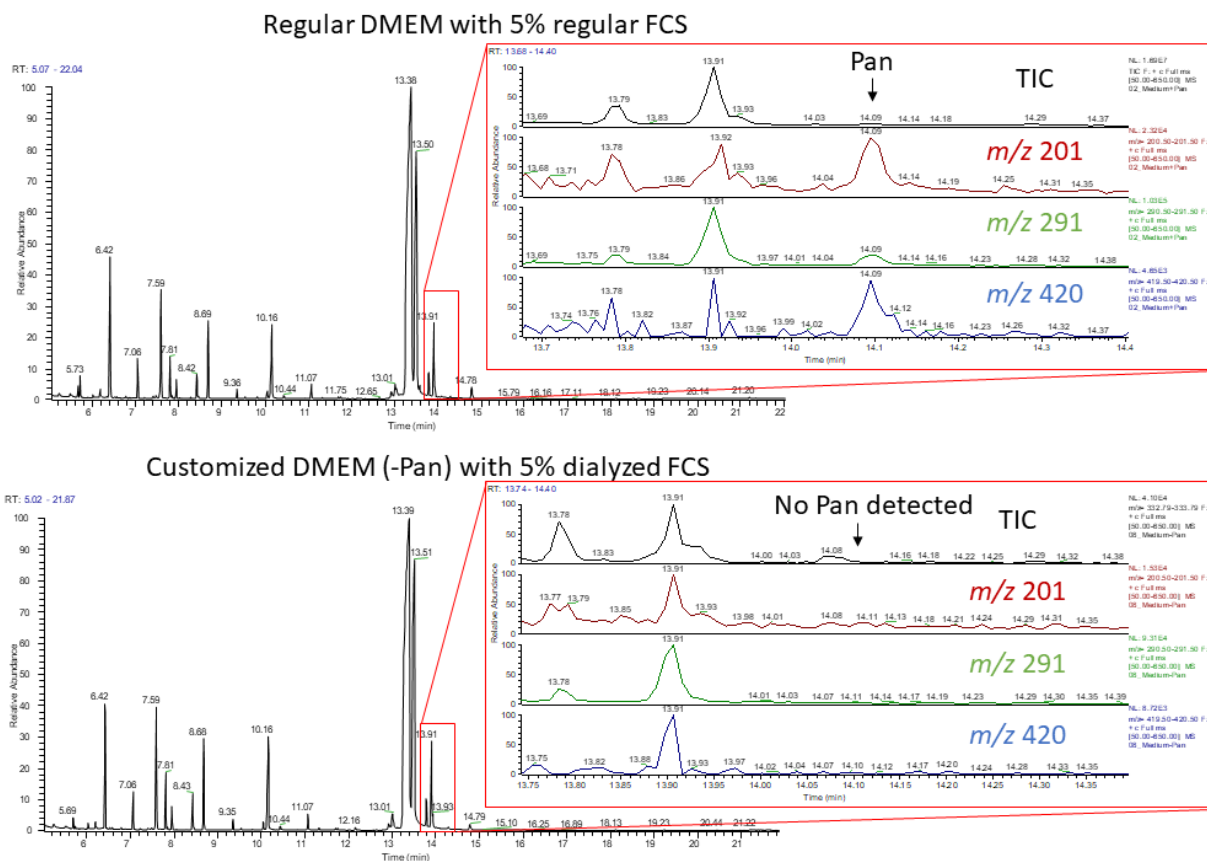

#### **Supplementary Fig. 4**

**a** GC-MS total ion chromatogram of polar metabolites extracted from *T. gondii* tachyzoites cultured under standard conditions (DMEM supplemented with 5% FBS). Peaks corresponding to three metabolites of interest are highlighted and their mass spectra are displayed: 2-trimethylsilyl-(TMS)-valine (Val), 3-TMS- $\beta$ -alanine ( $\beta$ -Ala), and 3-TMS-pantothenate (Pan). Qualifier ions are highlighted in red. All metabolites were identified based on the retention time and ion chromatogram of authentic standards (natural abundance as well as stable isotope labeled metabolites). **b** Representative LC-MS total ion chromatogram (TIC) of parasites grown under standard culture conditions and selected ion chromatograms corresponding to the mass of l-alanine,  $\beta$ -Ala and Pan  $[M+H]^+$ -ions. The accurate mass, retention time and peak intensity are given. Metabolite extracts were analyzed in positive mode and metabolites were identified based on the retention time and accurate mass of authentic standards.

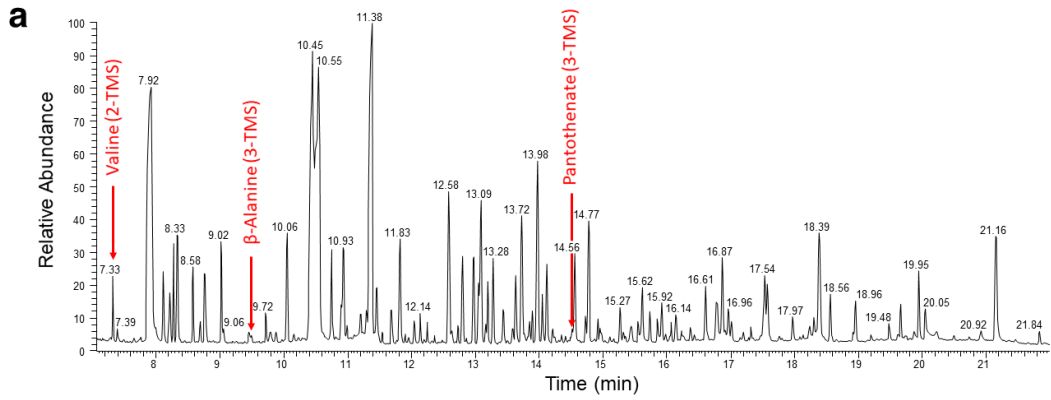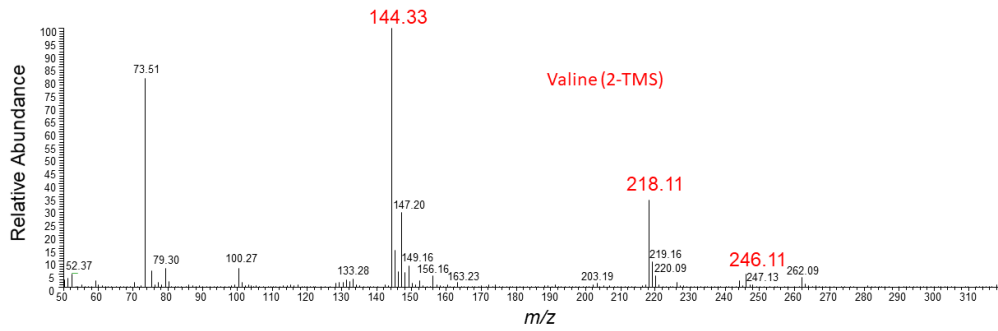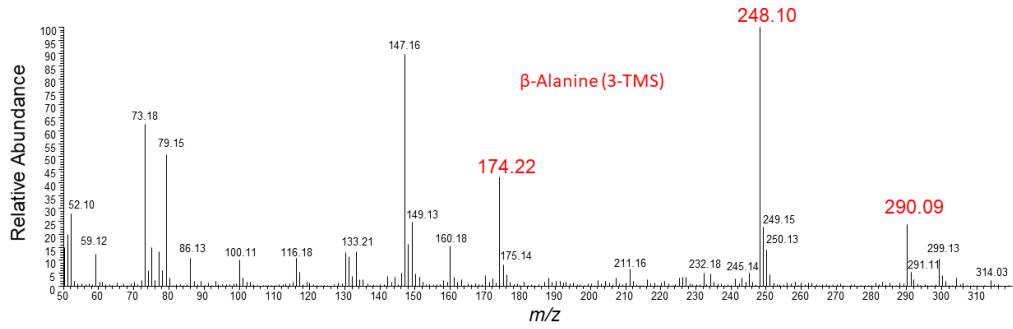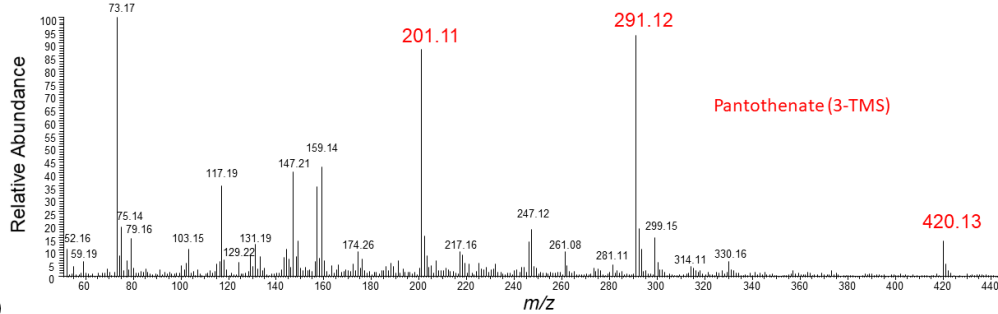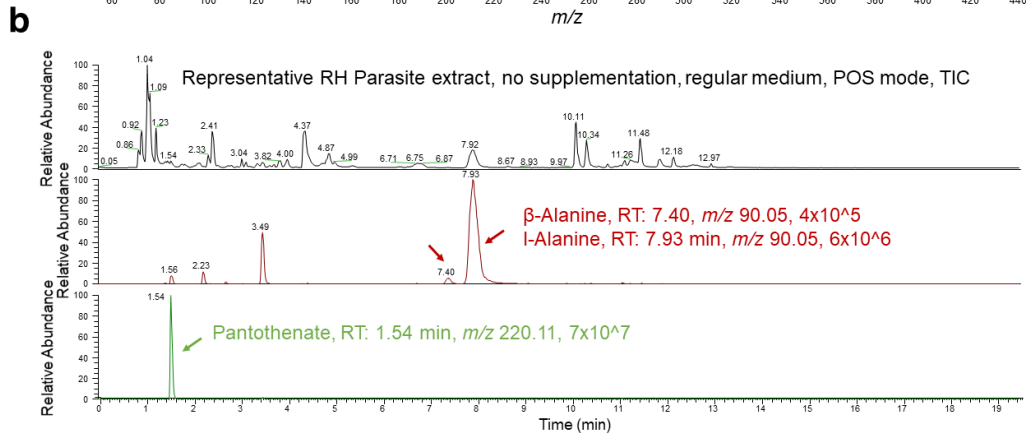

## Supplementary Fig. 5

Representative LC-MS total ion chromatogram (TIC) of a cell extract of parasites grown in medium containing 0.8 mM  $^{13}\text{C}_3/^{15}\text{N}$ - $\beta$ -Ala and selected ion chromatograms corresponding to the mass of unlabeled l-alanine,  $\beta$ -Ala and  $^{13}\text{C}_3/^{15}\text{N}$ - $\beta$ -Ala  $[\text{M}+\text{H}]^+$ -ions. The accurate mass, retention time and peak intensity are given. Metabolite extracts were analyzed in positive mode and metabolites were identified based on the retention time and accurate mass of authentic standards.

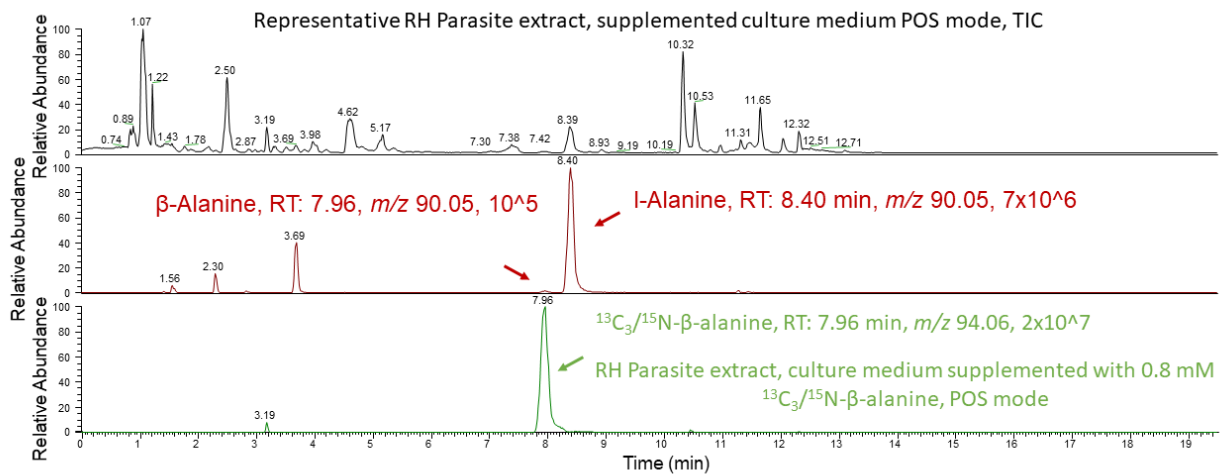



### Supplementary Fig. 6

Size exclusion chromatography of *E. coli* purified MBP-PBALcd. In the inset, coomassie-stained gel of the purified MBP-PBALcd (expected MW of 92 kDa). Source data are provided in the Supplementary File.

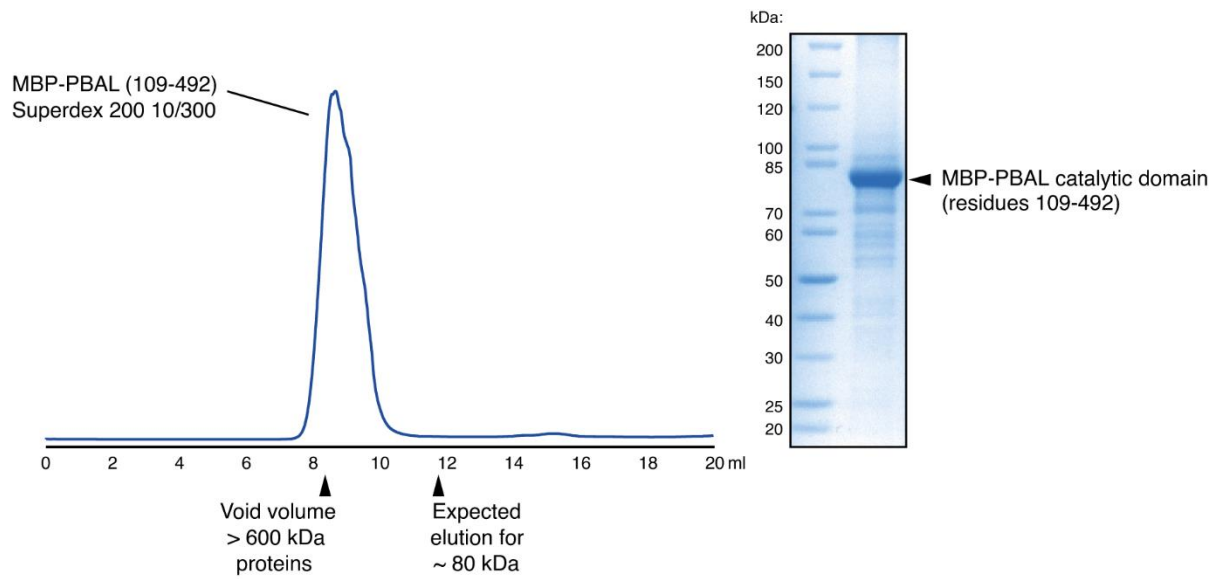

### Supplementary Fig. 7

**a** Upper panels: LC-MS total ion chromatogram of a standard metabolite mix containing Pan,  $\alpha$ -ketoisovalerate, pantoate,  $\beta$ -Ala and l-alanine and overlaid ion chromatograms corresponding to the  $[M-H]^-$  ions of Pan, pantoate and  $\alpha$ -ketoisovalerate detected in negative mode. The retention time and accurate mass are given. Lower panels: Standard metabolite mix as above but analyzed in positive mode. The selected ion chromatograms corresponding to the mass of unlabeled l-alanine,  $\beta$ -Ala and  $^{13}C_3/^{15}N$ - $\beta$ -Ala  $[M+H]^+$ -ions are displayed in the bottom panel. The retention time and accurate mass are given. **b** Representative LC-MS total ion chromatogram of a parasite extract of cells grown under standard culture conditions. The selected ion chromatograms corresponding to the  $[M-H]^-$ -ions of Pan, pantoate and  $\alpha$ -ketoisovalerate in negative mode are shown. Pan is abundantly detected, while pantoate is absent and  $\alpha$ -ketoisovalerate is just detected above background noise. **c** Representative LC-MS total ion chromatogram (TIC, upper panel) of a parasite extract of cells grown in medium supplemented with 0.8 mM  $\alpha$ -ketoisovalerate (middle panel) or 0.8 mM pantoate (bottom panel). The selected ion chromatograms corresponding to the  $[M-H]^-$ -ions of pantoate and  $\alpha$ -ketoisovalerate detected in negative mode are shown. The accurate mass, retention time and peak intensity are given.

**a**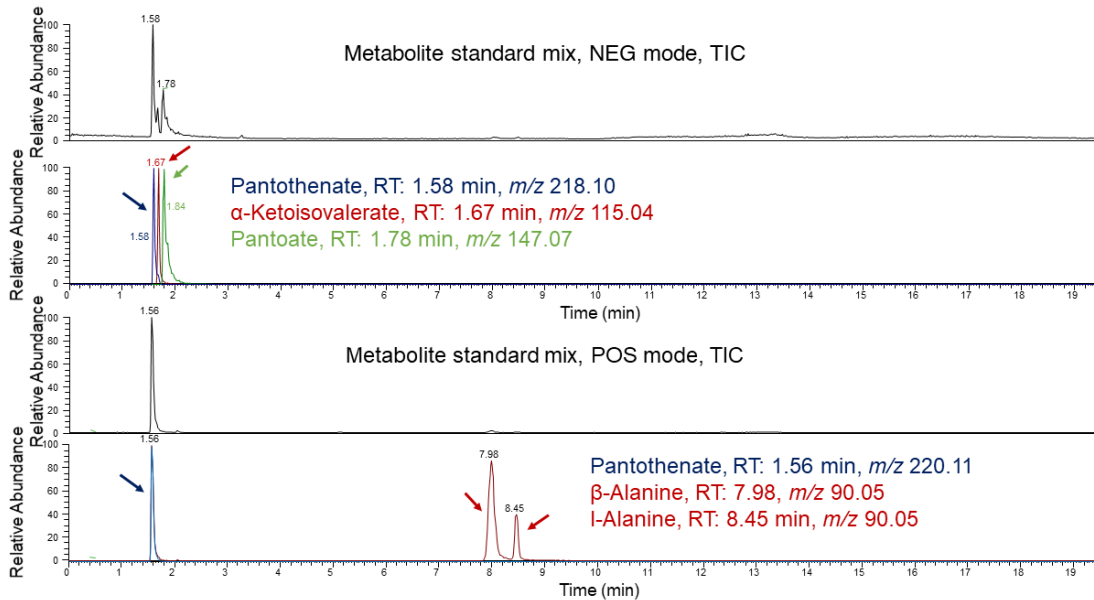**b**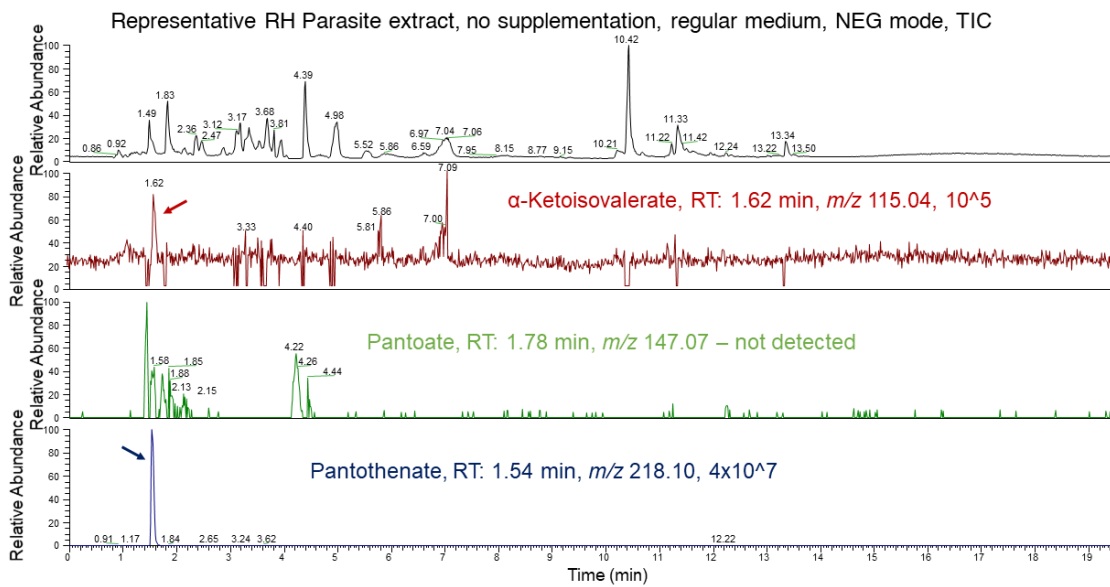**c**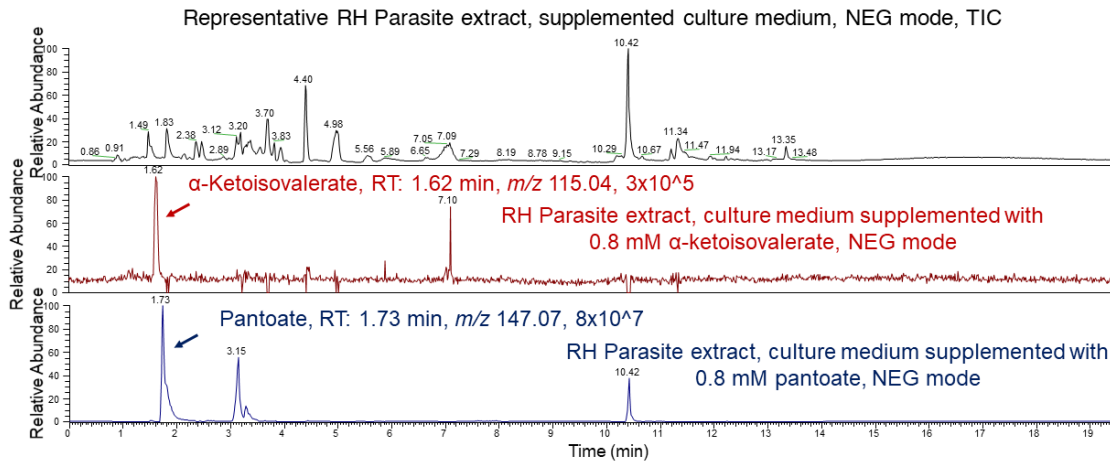

### Supplementary Fig. 8

**a** Percent labeling of Pan when RH parental, *bcat-ko*, *kphmt-kpr-ko*, and *pbal-ko* were grown in medium supplemented with  $^{13}\text{C}_3/^{15}\text{N}$ - $\beta$ -Ala, and pantotate or  $\alpha$ -ketoisovalerate (all 0.8 mM). The percent labeling was calculated based on the abundance of all detected isotopologues of Pan, and correction of natural abundance background (negative mode analysis,  $n = 3$ , mean and SD).

**b** Percent labeling of Pan when ME49 parental tachyzoites and 6 days alkaline-stressed bradyzoites were grown in medium supplemented with  $^{13}\text{C}_3/^{15}\text{N}$ - $\beta$ -Ala, and pantotate or  $\alpha$ -ketoisovalerate (all 0.8 mM). The percent labeling was calculated based on the abundance of all detected isotopologues of Pan, and correction of natural abundance background (negative mode analysis,  $n = 3$ , mean and SD).

**c** GC-MS analysis of Pan labeling in ME49 parental tachyzoite metabolite extracts of parasites incubated for 40 hours in medium containing 2 mM  $^{13}\text{C}_3/^{15}\text{N}$ - $\beta$ -Ala. The percent labeling was calculated based on the abundance of all detected isotopologues of Pan, and correction of natural abundance background ( $n = 3$ , mean and SD).

**d** Percent labeling of Pan from parasite extracts when ME49 parental tachyzoites and 6 days Shield treated ddBFD1 bradyzoites were grown in medium supplemented with  $^{13}\text{C}_3/^{15}\text{N}$ - $\beta$ -Ala (0.8 mM). The percent labeling was calculated based on the abundance of all detected isotopologues of Pan, and correction of natural abundance background ( $n = 4$ , mean and SD).

$n$  number of independent biological replicates. Source data are provided in the Supplementary File.

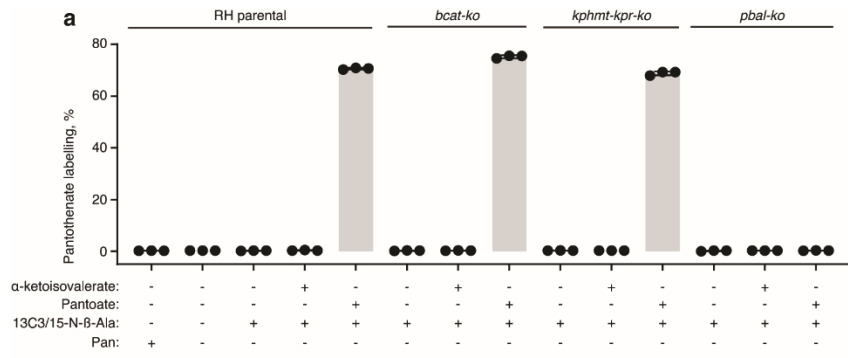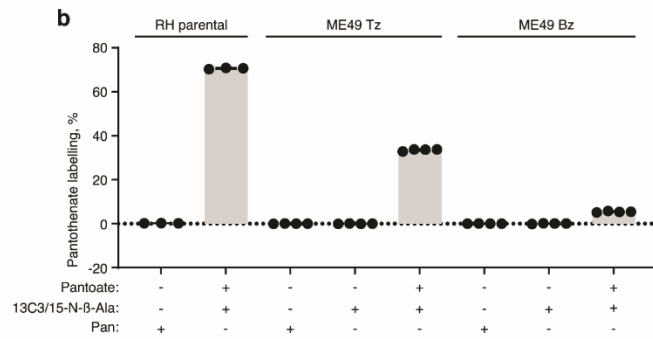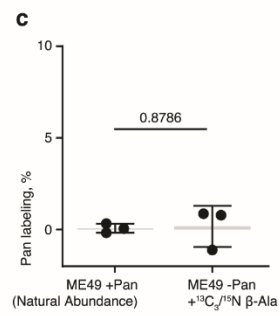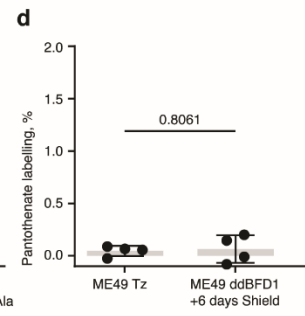

## Supplementary Fig. 9

**a** Cartoon representation and integration PCR for the knockout of *kphmt-kpr* and *pbal* genes, respectively, in ME49 parasites. Expected base pairs, as well as numbered primers are indicated.

**b** Cartoon representation and integration PCR for the knock-in of *::cTgPBAL-myc* and *cEcPBAL-myc* in the *UPRT* locus for complementation of ME49 *pbal-ko*, respectively. Expected base pairs, as well as numbered primers are indicated.

**c** Western blot of seroconversion of *pbal-ko* infected mice that did not present any brain cysts (1 mouse from all experiments). 1Kb plus DNA ladder (Thermo 10787018) was used for all agarose gel electrophoresis. Source data are provided in the Supplementary File.

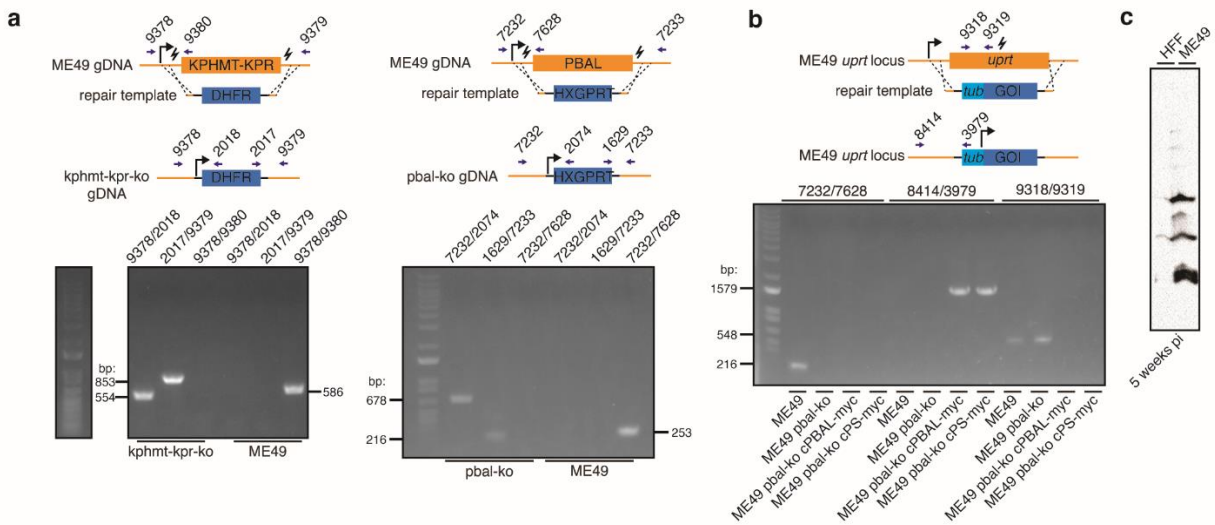

## Supplementary Table 1 – Primers

| construct     | number | sequence                                                  | description                |
|---------------|--------|-----------------------------------------------------------|----------------------------|
| PanK1-mAID-HA | 9157   | GTCTCGAATGGACTCGAATGAGTTTTAGAGCTAGAAATAGC                 | gRNA cloning               |
|               | 9158   | GACGAATGCCCCGTGGAAAAATCCCGCTGCGCTAGCAAGGGCTCGGG           | PCR homology template      |
|               | 9159   | ATGGATACAATGCGGCTAAAGACAACGGCCTGGAGCTCCACCGCGG            | PCR homology template      |
|               | 9160   | GGCGCTTGGAGCTCTGG                                         | 5' integration forward     |
|               | 9161   | ACGCATTTGCCTCGATCC                                        | 3' integration reverse     |
| PanK1-Ty      | 9266   | GACGAATGCCCCGTGGAAAAATCCCGCTGCCGCCCGCGCGCATGCA            | PCR homology template      |
|               | 9267   | ATGGATACAATGCGGCTAAAGACAACGGCCGCTGGAGCTCCACCGCGG          | PCR homology template      |
| PanK2-mAID-HA | 9162   | GAGGTGGAAAGCGTGCAGCGGTTTTAGAGCTAGAAATAGC                  | gRNA cloning               |
|               | 9163   | CACGTTCTTCTGCCAGAGAAGAGAGCGAGGCTAGCAAGGGCTCGGG            | PCR homology template      |
|               | 9164   | TCTGTGTCTCTCGAGAGCACTCCGGGCTCCTGGAGCTCCACCGCGG            | PCR homology template      |
|               | 9165   | CACTCCTCGCGTACGC                                          | 5' integration forward     |
|               | 9263   | CTCTGTGTCGACGTA CTGCC                                     | 3' integration reverse     |
| PanK2-Ty      | 9268   | CACGTTCTTCTGCCAGAGAAGAGAGCGAGCGCCCCGCGCGCATGCA            | PCR homology template      |
|               | 9269   | TCTGTGTCTCTCGAGAGCACTCCGGGCTCCGCTGGAGCTCCACCGCGG          | PCR homology template      |
| PPCDC-mAID-HA | 7897   | GACAAGTAGGCAAGAGCAGTGGTTTTAGAGCTAGAAATAGC                 | gRNA cloning               |
|               | 7798   | TCTGCGTCTCTATGCAGACACAAGGTTGCTAGCAAGGGCTCGGG              | PCR homology template      |
|               | 7799   | ACATTGAAGACCTGTGATGGAAGAGAAGAGGAATTGGAGCTCCACCGC          | PCR homology template      |
|               | 6255   | GAAAGAGATGCGAGTACAGAGAG                                   | 5' integration forward     |
|               | 7726   | AACCTCGGGGCATTCTTG                                        | 3' integration reverse     |
| PPCDC-Ty      | 6253   | GGCGGTACCGCTCTGCGACAATTTAGTG                              | FW cloning 3' <i>PPCDC</i> |
|               | 6254   | GGCATGCATAGAACCTTTGTGTCTGCATAG                            | RV cloning 3' <i>PPCDC</i> |
| DPCK-iKD      | 7960   | GTCTTCCGACAGTTTCTAAAGTTTTAGAGCTAGAAATAGC                  | gRNA cloning               |
|               | 8247   | GCAAGAGTTCATTGCTGCCAAAAAGCCGACATGTTTGCGGATCCGGGG          | PCR homology template      |
|               | 8256   | CCAAAGGAATAACACTACGGCGGTGATCGCCATTTTGATATCCCTAGGAATCACTCG | PCR homology template      |
|               | 8249   | GGACAACGAACGGGGCAAG                                       | 5' integration forward     |
|               | 8250   | AGCCATCCAAAGCAGAAGCC                                      | 3' integration reverse     |

|                      |       |                                                               |                            |
|----------------------|-------|---------------------------------------------------------------|----------------------------|
| DPCk-SMmyc           | 8251  | GCTACGGTTGGTGCCGTTGTGTTTTAGAGCTAGAAATAGC                      | gRNA cloning               |
|                      | 9153  | CAGGGCATTGCGTACTTTAGGGGGCGTATAATGGAGCAAAAAGTATATCG            | PCR homology template      |
|                      | 9154  | CCCGCCGATTGTACCCGAGAGGATTAACCAGGGCGAATTGGAGCTCC               | PCR homology template      |
| cDPCk                | 9046  | CTTGAATTCAGAAAAATGGCGATCACCGCCG                               | Fw cDNA cloning            |
|                      | 9047  | TTCGATATCTATACGCCCCCTAAAGTACGC                                | Rv cDNA cloning            |
| PBAL-Ty              | 7793  | AATGGGCCCCCGCTCTCTTCAACACGC                                   | Fw cloning 3' <i>PBAL</i>  |
|                      | 7794  | AACCTGCAGGCAGCCTCAGGTCCGTAC                                   | Rv cloning 3' <i>PBAL</i>  |
| PBAL-ko              | 7228  | GTAATGGGGATGTCAAGTTGACCAACATTTCGCTAAATCTGGTTTTAGAGCTAGAAATAGC | 2gRNA cloning              |
|                      | 7229  | GCTATTTCTAGCTCTAAAACAACGAAGCGCAGGGTTGCTAAACTTGACATCCCCATTAC   | 2gRNA cloning              |
|                      | 7230  | ATCGAGCGGACTCCCCGAGCTTGGGTGTTTGCATTCAAACCCGCCCGC              | PCR homology template      |
|                      | 7231  | ACTTCTCGTACCGCACTGCAGAGCTGACTGGCGGCCGCTCTAGAAC                | PCR homology template      |
|                      | 7232  | CAGGTGCAAAGGCTAGGAC                                           | 5' integration forward     |
|                      | 7233  | TCTCTACACCCGGAGCTTC                                           | 3' integration reverse     |
|                      | 7628  | CGAGCTCCACAGAAAAGTGC                                          | 5' integration reverse     |
| KPHMT-KPR-SM-Myc     | 9200  | GTGATTGTCGCCACTCAAACGTTTTAGAGCTAGAAATAGC                      | gRNA cloning               |
|                      | 9381  | ATGAATCTCGTCAAGTTCATCACCGAGCGAATGGAGCAAAAAGTATATCG            | KOD homology template      |
|                      | 9382  | TGGGCAGGATGAAGAGCTACGAGGACATGCGGGCGAATTGGAGCTCC               | KOD homology template      |
| KPHMT-KPR-ko         | 9374  | GTAATGGGGATGTCAAGTTGTGTTGGCTGCTGGGGCACAGGTTTTAGAGCTAGAAATAGC  | 2gRNA cloning              |
|                      | 9375  | GCTATTTCTAGCTCTAAAACGTTTGTAGTGGCGACAATCACAACCTTGACATCCCCATTAC | 2gRNA cloning              |
|                      | 9376  | TTTGAATGACACAGTAGTCTTGTCTGTAGCGGAAGATCCGATCTTGC               | KOD homology template      |
|                      | 9377  | GCACACTGACACTGCGCCATTTACGCGGTCGCGGCCGCTCTAGAACTAG             | KOD homology template      |
|                      | 9378  | CTATGCCTTGCTGTAGCG                                            | 5' integration forward     |
|                      | 9379  | TGGGGAACACACAGTAGCG                                           | 3' integration reverse     |
|                      | 9380  | AAGCGTGGCCAACAAGG                                             | 5' integration reverse     |
| c <i>Tg</i> PBAL-myc | 10121 | CTTGAATCCCTTTTTTCGACAAAATGGACACCTCAGATTTAGCG                  | cDNA cloning <i>TgPBAL</i> |
|                      | 9156  | TTCGATATCCAGCCTCAGGTCCGTAC                                    | cDNA cloning <i>TgPBAL</i> |
| c <i>Ec</i> PBAL-myc | 10126 | CTTGAATCCCTTTTTTCGACAAAATGTTAATTATCGAAACCCTGCCGC              | cDNA cloning <i>EcPBAL</i> |
|                      | 10127 | TTCGATATCCGCCAGCTCGACATTTTG                                   | cDNA cloning <i>EcPBAL</i> |
|                      | 8414  | CTTCAGCACACCACCGTTTCAG                                        | 3' integration uprt        |
|                      | 9318  | GAAGAACGACGCTGCAAAC                                           | uprt locus fw              |
|                      | 9319  | TTGCCATGTCAAGTTCCTACC                                         | uprt locus rv              |



|                   |       |                                                  |                                                   |
|-------------------|-------|--------------------------------------------------|---------------------------------------------------|
| PBAL-cd           | 10166 | CCACCAATGCATGCGCAGCGACCTCGCCG                    | clone full catalytic domain <i>PBAL</i> in pStrep |
|                   | 10167 | CGTGGTACCTTAGGACCCTGTCCCTGGC                     | clone full catalytic domain <i>PBAL</i> in pStrep |
|                   | 9975  | TGTA CTCCAATCCAATGCATGCGACACCTCAGATTTAGCGAATGTTG | clone full length <i>PBAL</i> in pStrep           |
|                   | 9976  | ACGCGTGGTACCGGCCGCCCTTAAAGCCTCAGGTCCGTCAC        | clone full length <i>PBAL</i> in pStrep           |
| universal primers | 5370  | GCCGTAGTCTTCAATGGGTTTGG                          | HXGPRT reverse                                    |
|                   | 1629  | CAGTGACACCGCGGTGGAGG                             | HXGPRT forward                                    |
|                   | 7081  | GGGTCGAGCCCGAGCCCT                               | mAID reverse                                      |
|                   | 4609  | CGACAACACCTTCTACAACGCTG                          | HXGPRT fw                                         |
|                   | 3596  | GGCCTTCGATACCGACTTCATTGAG                        | tet reverse                                       |
|                   | 1935  | cgctgaccacttcattattcttctgg                       | sag1 3' forward                                   |
|                   | 2074  | CCGTAGTCTTCAATGGGTTTGGACGC                       | HXGPRT reverse                                    |
|                   | 2018  | CTTGGGGTCATCGCGACGACCAGAC                        | DHFR rv                                           |
|                   | 2017  | GTCAC TTGTTGCCAGTTCTAC                           | DHFR fw                                           |
|                   | 9318  | GAAGAACGACGCTGCAAAC                              | uprt locus                                        |
|                   | 9319  | TTGCCATGTCAAGTTCCTACC                            | uprt locus                                        |
|                   | 3979  | ACACAAGGTGATTGTGTAACACCG                         | tubulin promoter rv                               |

## Supplementary Methods

### liquid chromatography conditions and mass spectrometry parameters

#### Reversed-phase UPLC-MS conditions

Quantification of Pan, PPan-Cys, deP-CoA and CoA (method A) was performed on the Q Exactive Plus analytical platform as follows: 10  $\mu$ l of sample (6°C) were injected and eluted with a tailored gradient: 0%B (1 min), 5-25%B in 7 min, 25-40%B in 1 min and hold 3 min, wash at 95%B (total runtime of 20 min). Here and in all other methods, blanks (ultrapure water or 80% acetonitrile for HILIC analyses) were injected after every sample to avoid carry-over. Eluent A was 50 mM ammonium acetate buffer (pH 6.9) and eluent B was acetonitrile. Flow rate and column oven temperature were respectively of 250  $\mu$ l/min and 30 °C. The mass spectrometer was operated in positive polarity with a heated electrospray ionization (HESI-II) probe. Electrospray voltage was set to 3500 V; the sheath gas, auxiliary gas and sweep gas were set, respectively, to 46, 11 and 2 (arbitrary units, nitrogen). The auxiliary gas heater and transfer capillary temperatures were of 350 °C and 300 °C. PRM experiments were looped for each precursor with an isolation window of 0.7u, a normalized collision energy of 30 eV. All experiments were acquired in profile mode at 17.5 k resolution with an AGC of 1e6 and a fill time of 50 ms (1  $\mu$ scan).

For labelling experiments (method B - [Fig. 5f](#)), 5  $\mu$ l of sample (6°C) were injected and separated with a linear gradient from 0%B (1 min hold) to 95%B in 14 min (total runtime of 20 min after column wash and reconditioning). Eluent A was 5 mM ammonium formate with 0.25% formic acid (pH 2.8) and eluent B was acetonitrile. Flow rate and column oven temperature were respectively of 250  $\mu$ l/min and 35 °C. Mass spectrometry experiments were a full scan MS looped with PRM (FS-PRM) experiments for each precursor (isol. window of 0.7u - NCE = 25). Electrospray interface settings were as described above, and MS data was acquired in profile mode at 35 k resolution with an AGC of 1e6 and a fill time of 100 ms (1  $\mu$ scan).

For the QTRAP 3200 analytical platform, 10 µl of sample (8°C) were injected and eluted with the same gradient as for method A with the Q Exactive Plus instrumentation. The mass spectrometer was operated in positive polarity with a TurboV ion source fitted with a TurbolonSpray probe (SCIEX). The electrospray voltage was set to 5500 V, the nebulizer gas and auxiliary gas (nitrogen) were set to 40 and 50 psi, respectively. The auxiliary gas heater was set to 500 °C and the curtain plate (CUR), entrance lens (EP) and collision cell exit (CXP) potentials were of 10 V. The declustering potential (DP) was set to 70 V. The MRM transitions of the precursor ion (Q1) and product ion (Q3), as well as the collision energy (CE) are summarized in the table (Q1 and Q3 were operated at unit resolution):

| Name                                                         | Q1 (m/z) | Q3 (m/z) | Dwell (ms) | CE (eV) |
|--------------------------------------------------------------|----------|----------|------------|---------|
| β-Ala_1                                                      | 90.1     | 44.0     | 30         | 40      |
| <sup>13</sup> C <sub>3</sub> / <sup>15</sup> N-β-Ala_1       | 94.1     | 47.0     | 30         | 40      |
| β-Ala_2                                                      | 90.1     | 55.0     | 30         | 30      |
| <sup>13</sup> C <sub>3</sub> / <sup>15</sup> N-β-Ala_2       | 94.1     | 58.0     | 30         | 30      |
| Panhotenate_1                                                | 220.1    | 90.0     | 30         | 35      |
| <sup>13</sup> C <sub>3</sub> / <sup>15</sup> N-panhotenate_1 | 224.1    | 94.2     | 30         | 35      |
| Panhotenate_2                                                | 220.1    | 71.9     | 30         | 45      |
| <sup>13</sup> C <sub>3</sub> / <sup>15</sup> N-panhotenate_2 | 224.1    | 75.9     | 30         | 45      |
| CoA_1                                                        | 768.1    | 261.0    | 30         | 26      |
| <sup>13</sup> C <sub>3</sub> / <sup>15</sup> N-CoA_1         | 772.1    | 265.0    | 30         | 26      |
| CoA_2                                                        | 768.1    | 428.0    | 30         | 23      |
| <sup>13</sup> C <sub>3</sub> / <sup>15</sup> N-CoA_2         | 772.1    | 428.0    | 30         | 23      |
| Acetyl-CoA_1                                                 | 810.1    | 303.0    | 30         | 27      |
| <sup>13</sup> C <sub>3</sub> / <sup>15</sup> N-acetyl-CoA_1  | 814.1    | 307.0    | 30         | 27      |

|                                                             |       |       |    |    |
|-------------------------------------------------------------|-------|-------|----|----|
| Acetyl-CoA_2                                                | 810.1 | 428.0 | 30 | 24 |
| <sup>13</sup> C <sub>3</sub> / <sup>15</sup> N-acetyl-CoA_2 | 814.1 | 428.0 | 30 | 24 |

For the analyses performed with the QTRAP 6500, the following UPLC-MS conditions were used: 8 µl of sample (6°C) were injected and eluted with the same gradient and column as described for method A. The mass spectrometer was operated with the same settings as previously mentioned except the curtain plate (CUR) and collision cell exit (CXP) potentials set to 30 V and 8 V respectively. The declustering potential (DP) was of 90 V. The set of MRM transitions was the same with the addition of two transitions to monitor dephospho-CoA:

| Name            | Q1 (m/z) | Q3 (m/z) | Dwell (ms) | CE (eV) |
|-----------------|----------|----------|------------|---------|
| Dephospho-CoA_1 | 688.2    | 261.1    | 30         | 26      |
| Dephospho-CoA_2 | 688.2    | 348.1    | 30         | 23      |

### HILIC UPLC-MS conditions

HILIC analyses were carried out on the Q Exactive Plus analytical platform as follows: 5 µl of sample (6°C) were injected and eluted with a gradient adapted <sup>71</sup>: 100%B held for 6 min and stepped down to 94.1%B, 94.1-82.4%B in 4 min, 82.4-70.6%B in 2 min and back to 100%B (total runtime of 20 min). Eluent A was 10 mM ammonium formate with 0.15% formic acid in water and eluent B was 10 mM ammonium formate with 0.15% formic acid in acetonitrile-water (85:15, v/v). Flow rate and column oven temperature were respectively of 400 µl/min and 40 °C. The mass spectrometer was operated in positive or negative polarity with a heated electrospray ionization (HESI-II) probe. Electrospray settings were as aforementioned. A full MS experiment was followed with PRM experiments looped for each precursor with an isolation window of 0.7u, a normalized collision energy of 30 eV. All experiments were acquired in profile mode at 17.5 k resolution with an AGC of 1e6 and a fill time of 50 ms (1 µscan).

## Supplementary Figures raw blots and gels

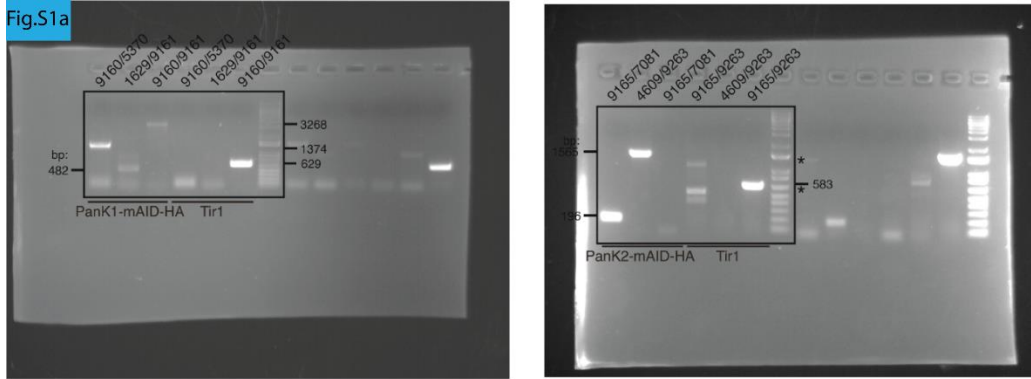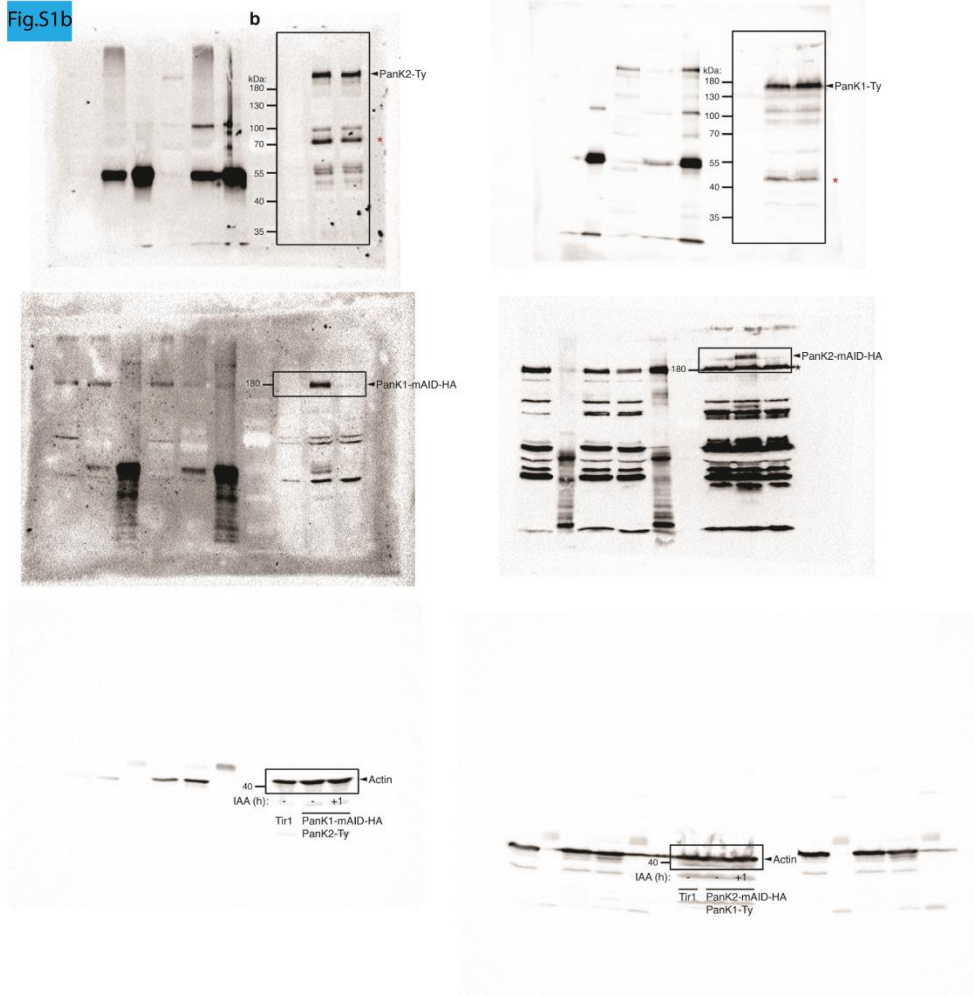

Fig.S1c

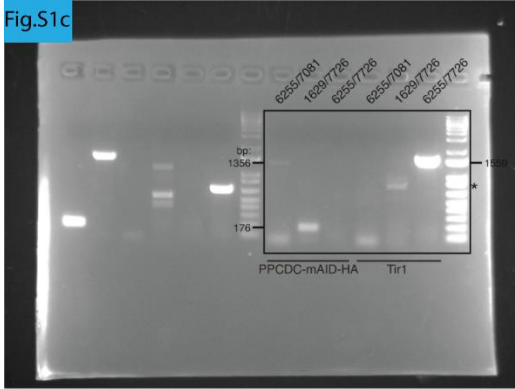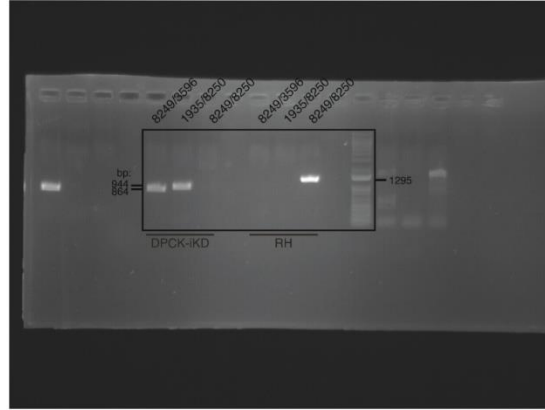

Fig.S2a

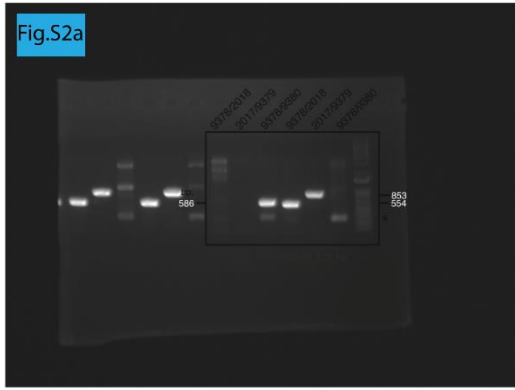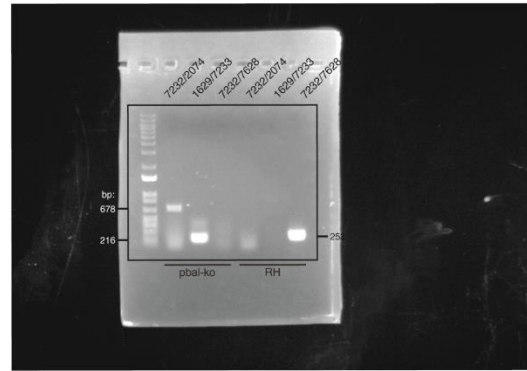

Fig.S6a

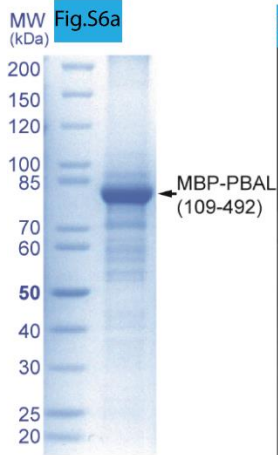

Fig.S9a

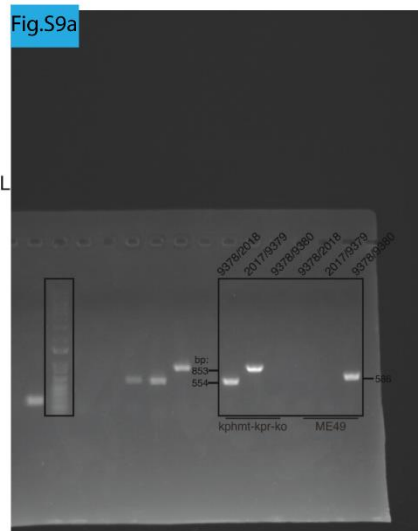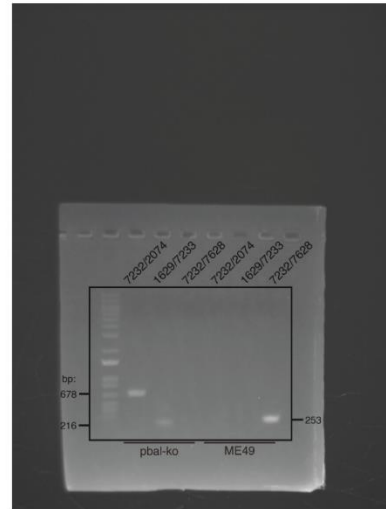

Fig.S9b

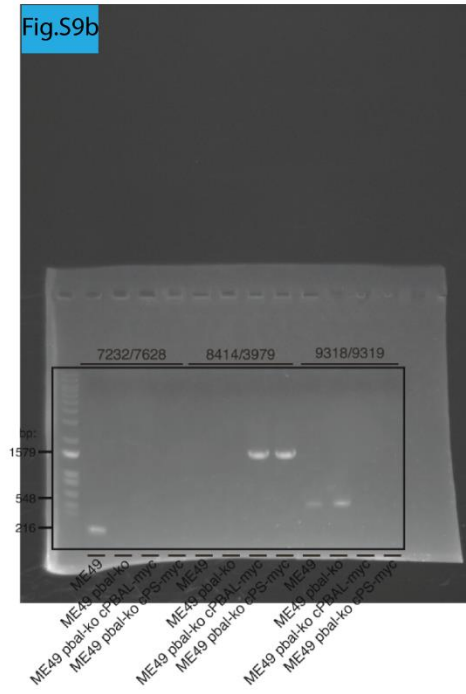

c

Fig.S9c

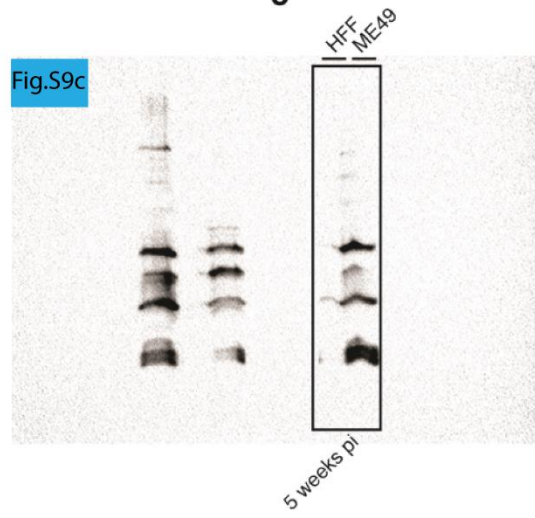

Supplement: 41467_2022_27996_MOESM1_ESM.pdf [file 41467_2022_27996_MOESM1_ESM.pdf]
