# Supplementary material for: Pantothenate biosynthesis is critical for chronic infection by the neurotropic parasite Toxoplasma gondii
Source: PubMed Central journal article supplement (PMC8764084; doi:10.1038/s41467-022-27996-4), 2022-01-17
Supplement: 41467_2022_27996_MOESM5_ESM.pdf [file 41467_2022_27996_MOESM5_ESM.pdf]

Muscle alignment of TgPBAL orthologues

Black shading represents exact match

In red catalytic residues from crystallography DOI: 10.1110/ps.0241803

In green shade if demonstrated essential for protein activity DOI: 10.1021/bi049676n

|                         | 10          | 20         | 30          | 40         | 50         | 60            |     |
|-------------------------|-------------|------------|-------------|------------|------------|---------------|-----|
| ETH_00031750            | .....       | .....      | .....       | .....      | .....      | .....         | 3   |
| Vbra_16581              | ---MNS      |            |             |            |            |               | 43  |
| Cvel_3471               | ---MGGVRTL  | YASGGGG    | -----       | -VKSLKMRDL | LRRKKERRKI | TVITAYDFIG    | 60  |
| SN3_00101300            | MSYVGGPTSS  | TSEGGGASSL | CFGNFMSFEP  | QLKSLKLEDL | LGRKKAGCKI | TMITAYDYLS    | 12  |
| NCLIV_039640            | PETEETSS    | -----      | -----       | -----      | -----      | -----HQVP     | 5   |
| TGME49_265870           | ---METHT    | -----      | -----       | -----      | -----      | -----         | 5   |
| HHA_265870              | ---MDTSD    | -----      | -----       | -----      | -----      | -----         | 5   |
| XP_002768075.P. marinus | -----       | -----      | -----       | -----      | -----      | -----         | 1   |
| XP_002767048.P. marinus | -----       | -----      | -----       | -----      | -----      | -----         | 1   |
| sp P31663 PANC_ECOLI    | -----       | -----      | -----       | -----      | -----      | -----         | 1   |
| sp P9WIL5 PANC_MYCTU    | -----       | -----      | -----       | -----      | -----      | -----         | 1   |
|                         | 70          | 80         | 90          | 100        | 110        | 120           |     |
| ETH_00031750            | .....       | .....      | .....       | .....      | .....      | .....         | 14  |
| Vbra_16581              | AQVANSAMLD  | CILVGDSLAN | VVLGHARTNQ  | IGMDEMLYHC | KSVTRGNSRC | FVIGDMPFGS    | 103 |
| Cvel_3471               | GRIADAAAI   | MVLVGDSLGN | VVLGHSRTDK  | VTMEDMLHHT | RAVTRGCKRA | FVVGDLPPFGS   | 69  |
| SN3_00101300            | SQALRRTETS  | LLLLPLGDV  | LRLGSPRRVT  | RSSASHIHEQ | AYLRRF---  | A SAVLPPFAVS  | 26  |
| NCLIV_039640            | -----       | -----      | ---LAQLGRDT | LP-----    | -----A     | FSAEFLPSSS    | 22  |
| TGME49_265870           | -----       | -----      | ---LANVG    | -P-----    | -----Q     | FSVELGTRFA    | 22  |
| HHA_265870              | -----       | -----      | ---LANVG    | -S-----    | -----M     | FSVELGTRFA    | 11  |
| XP_002768075.P. marinus | -----       | -----      | -----       | -----      | -----      | Q LSLVPKPRSD  | 11  |
| XP_002767048.P. marinus | -----       | -----      | -----       | -----      | -----      | M LSLVPKPRSD  | 9   |
| sp P31663 PANC_ECOLI    | -----       | -----      | -----       | -----      | -----      | M LI IETLPL-- | 8   |
| sp P9WIL5 PANC_MYCTU    | -----       | -----      | -----       | -----      | -----      | M TIPAFHP--   |     |
|                         | 130         | 140        | 150         | 160        | 170        | 180           |     |
| ETH_00031750            | .....       | .....      | .....       | .....      | .....      | .....         | 30  |
| Vbra_16581              | CREVSVHRST  | CGRVRE     | -----       | -----      | -----      | -----         | 163 |
| Cvel_3471               | YSTVDRAVQN  | AIRFVNEGGV | AAVKIEGPMY  | EQIKAVSOLT | PVVGHTGVLP | QTAENFLARG    | 179 |
| SN3_00101300            | CCTVEKALEN  | AHALMRE-GC | HAVKLEGPLL  | AQIQAISQFV | PVVAHLGLQP | QTASSFASRG    | 109 |
| NCLIV_039640            | SCFPCDAVIC  | NTSYST---  | -----       | -----MYST  | SATAHHGTGP | WAQENWDAFG    | 35  |
| TGME49_265870           | -AFF---PF-  | ---RATA    | -----       | -----      | -----      | -----         | 34  |
| HHA_265870              | -AKFCVQRL-  | ---NWSA    | -----       | -----      | -----      | -----         | 34  |
| XP_002768075.P. marinus | -AKFCVQKL-  | ---NLSA    | -----       | -----      | -----      | -----         | 27  |
| XP_002767048.P. marinus | I SELAAKISA | RIAAKA---  | -----       | -----      | -----      | -----         | 27  |
| sp P31663 PANC_ECOLI    | I SELAAKISA | RITAKS---  | -----       | -----      | -----      | -----         | 9   |
| sp P9WIL5 PANC_MYCTU    | -----       | -----      | -----       | -----      | -----      | -----         | 8   |
|                         | 190         | 200        | 210         | 220        | 230        | 240           |     |
| ETH_00031750            | .....       | .....      | .....       | .....      | .....      | .....         | 30  |
| Vbra_16581              | KTAKDAQYLV  | EAAQALEAAG | CCMIVLEKVC  | SEVAEEISR  | LTIPTIGIGA | GPHCDGQVLV    | 223 |
| Cvel_3471               | RTADEAITLL  | EDARAVEAAG | ASFLVLEKVA  | AEVAQEITSS | LSIPTIGIGA | GNVTDGQVLV    | 239 |
| SN3_00101300            | SGCLPWSRSN  | FFFSADCAE  | DAPLSTSSYM  | SAPSPPEGV  | LDACHTKAAE | RPRNVTLGQK    | 169 |
| NCLIV_039640            | -----       | -----      | -----       | ---PPRD    | R-----     | -----         | 41  |
| TGME49_265870           | -----       | -----      | ---NRKIC    | R-----     | -----      | -----         | 40  |
| HHA_265870              | -----       | -----      | ---NQEIC    | R-----     | -----      | -----         | 40  |
| XP_002768075.P. marinus | -----       | -----      | -----       | -----      | -----      | -----         | 27  |
| XP_002767048.P. marinus | -----       | -----      | -----       | -----      | -----      | -----         | 27  |
| sp P31663 PANC_ECOLI    | -----       | -----      | -----       | -----      | -----      | -----         | 9   |
| sp P9WIL5 PANC_MYCTU    | -----       | -----      | -----       | -----      | -----      | -----         | 8   |
|                         | 250         | 260        | 270         | 280        | 290        | 300           |     |
| ETH_00031750            | .....       | .....      | .....       | .....      | .....      | .....         | 49  |
| Vbra_16581              | WHDVLGLQSP  | GSLSLKFVRR | FGD---GWR   | ASCPIAATP  | EQQQQQ---  | -----         | 279 |
| Cvel_3471               | WHDVLGLCPP  | GFPKIKFAKT | FGGEPGWGWK  | AALHAVEEYA | EAVTRGIFPG | -QPQTFYMG     | 298 |
| SN3_00101300            | QHPCAPSQPP  | RTP-----   | ---RPI      | VLIHSPRELL | -AYRNA---  | -----         | 200 |
| NCLIV_039640            | -----       | -----      | ---REI      | LVVHSPQELV | -AYRNA---  | -----         | 59  |
| TGME49_265870           | -----       | -----      | ---SSH      | VRVLNPRNCP | RNCRNG---  | -----         | 59  |
| HHA_265870              | -----       | -----      | ---SSQ      | VRVLNPRNFP | RSHRNG---  | -----         | 59  |
| XP_002768075.P. marinus | -----       | -----      | ---GPP      | VVVRVSGDFV | ALHNTD---  | -----         | 46  |
| XP_002767048.P. marinus | -----       | -----      | ---GPP      | VVVRVSGDFV | ALHNTD---  | -----         | 46  |
| sp P31663 PANC_ECOLI    | -----       | -----      | ---LR       | QQIRRL---  | -----      | -----         | 17  |
| sp P9WIL5 PANC_MYCTU    | -----       | -----      | ---GEL      | NVYSAPGDVA | DVSRAL---  | -----         | 27  |
|                         | 310         | 320        | 330         | 340        | 350        | 360           |     |



|                         |         |       |       |       |       |     |
|-------------------------|---------|-------|-------|-------|-------|-----|
| HHA_265870              | RR----- | ----- | ----- | ----- | ----- | 132 |
| XP_002768075.P. marinus | GL----- | ----- | ----- | ----- | ----- | 51  |
| XP_002767048.P. marinus | GL----- | ----- | ----- | ----- | ----- | 51  |
| sp P31663 PANC_ECOLI    | GK----- | ----- | ----- | ----- | ----- | 22  |
| sp P9WIL5 PANC_MYCTU    | GR----- | ----- | ----- | ----- | ----- | 32  |

|                         |            |            |            |            |            |            |     |
|-------------------------|------------|------------|------------|------------|------------|------------|-----|
|                         | 670        | 680        | 690        | 700        | 710        | 720        |     |
| ETH_00031750            | .....      | .....      | .....      | .....      | .....      | .....      | 70  |
| Vbra_16581              | NAVVNPLTAL | YGVNNGALTR | PHFEPLISQI | AQEVSEVGRA | RGIRLPEGSN | LVKVVQRAAE | 584 |
| Cvel_3471               | NAAINPLTAL | MGICNGGLET | QPLSTVAAA  | AEEVVRVARS | KGVRLSEAS- | VRSALESTIR | 714 |
| SN3_00101300            | -----      | -----      | -----      | -----      | -----      | -----      | 373 |
| NCLIV_039640            | -----      | -----      | -----      | -----      | -----      | -----      | 119 |
| TGME49_265870           | -----      | -----      | -----      | -----      | -----      | -----      | 132 |
| HHA_265870              | -----      | -----      | -----      | -----      | -----      | -----      | 132 |
| XP_002768075.P. marinus | -----      | -----      | -----      | -----      | -----      | -----      | 51  |
| XP_002767048.P. marinus | -----      | -----      | -----      | -----      | -----      | -----      | 51  |
| sp P31663 PANC_ECOLI    | -----      | -----      | -----      | -----      | -----      | -----      | 22  |
| sp P9WIL5 PANC_MYCTU    | -----      | -----      | -----      | -----      | -----      | -----      | 32  |

|                         |            |            |            |            |            |            |     |
|-------------------------|------------|------------|------------|------------|------------|------------|-----|
|                         | 730        | 740        | 750        | 760        | 770        | 780        |     |
| ETH_00031750            | .....      | .....      | .....      | .....      | .....      | .....      | 70  |
| Vbra_16581              | TTAANTSSMR | TDVENRLPTE | ISAICGAIAS | EARKVGLSAP | VNEMLVHLIK | A---LEEQRQ | 641 |
| Cvel_3471               | GTARNQSSML | QDVQRGSQSE | VRAICGAVAE | EARRNGVAAP | LCSLLCLMVE | GKCLKQQQPQ | 774 |
| SN3_00101300            | -----      | -----      | -----      | -----      | -----      | -----      | 373 |
| NCLIV_039640            | -----      | -----      | -----      | -----      | -----      | -----      | 119 |
| TGME49_265870           | -----      | -----      | -----      | -----      | -----      | -----      | 132 |
| HHA_265870              | -----      | -----      | -----      | -----      | -----      | -----      | 132 |
| XP_002768075.P. marinus | -----      | -----      | -----      | -----      | -----      | -----      | 51  |
| XP_002767048.P. marinus | -----      | -----      | -----      | -----      | -----      | -----      | 51  |
| sp P31663 PANC_ECOLI    | -----      | -----      | -----      | -----      | -----      | -----      | 22  |
| sp P9WIL5 PANC_MYCTU    | -----      | -----      | -----      | -----      | -----      | -----      | 32  |

|                         |            |            |            |            |            |            |     |
|-------------------------|------------|------------|------------|------------|------------|------------|-----|
|                         | 790        | 800        | 810        | 820        | 830        | 840        |     |
| ETH_00031750            | .....      | .....      | .....      | .....      | .....      | .....      | 70  |
| Vbra_16581              | T-----     | -----TPPAP | ASPPLPPQPT | AAKETHAALA | PTAAATSPPM | ATRVCKTPSE | 687 |
| Cvel_3471               | RQQQEQHSKS | STYDGSPPAC | VSHPSPPSNG | LQANGHAEYV | SAGAKVSHTA | RTTLVRDPKK | 834 |
| SN3_00101300            | -----      | -----      | -----      | -----      | -----      | -----      | 373 |
| NCLIV_039640            | -----      | -----      | -----      | -----      | -----      | -----      | 119 |
| TGME49_265870           | -----      | -----      | -----      | -----      | -----      | -----      | 132 |
| HHA_265870              | -----      | -----      | -----      | -----      | -----      | -----      | 132 |
| XP_002768075.P. marinus | -----      | -----      | -----      | -----      | -----      | -----      | 51  |
| XP_002767048.P. marinus | -----      | -----      | -----      | -----      | -----      | -----      | 51  |
| sp P31663 PANC_ECOLI    | -----      | -----      | -----      | -----      | -----      | -----      | 22  |
| sp P9WIL5 PANC_MYCTU    | -----      | -----      | -----      | -----      | -----      | -----      | 32  |

|                         |            |            |            |            |            |            |     |
|-------------------------|------------|------------|------------|------------|------------|------------|-----|
|                         | 850        | 860        | 870        | 880        | 890        | 900        |     |
| ETH_00031750            | .....      | .....      | .....      | .....      | .....      | .....      | 115 |
| Vbra_16581              | LMGVRSTLPA | SARVAVFVFL | GGLHGDHML  | LDEASRR--- | GDRVWTSIFL | NQLQFQSAKD | 744 |
| Cvel_3471               | LTALRKQVPP | SSRVVVFVFL | GGLHEGHLAL | VEDARRRCGE | GGQVWCSEVL | NRLQFQSAQD | 894 |
| SN3_00101300            | -----      | --RISIVPTL | GGLHEGHLHL | MROAACL--- | SDEVVVSIFL | NPLQFQSSKD | 418 |
| NCLIV_039640            | -----      | --RISIVPTM | GGLHEGHLHL | IRGAICT--- | GDEVVVTIEV | NALQFHSAKD | 164 |
| TGME49_265870           | -----      | --RISIVPTM | GGLHEGHLHL | IRGAICT--- | GDEVVVTIEV | NALQFHSAKD | 177 |
| HHA_265870              | -----      | --RISIVPTM | GGLHEGHLHL | IRGAICT--- | GDEVVVTIEV | NALQFHSAKD | 177 |
| XP_002768075.P. marinus | -----      | --SVGFVPTM | GSLHSGHMKL | IATARPN--- | HDVLVVSIEV | NPAQFSPEED | 96  |
| XP_002767048.P. marinus | -----      | --SVGFVPTM | GSLHSGHMKL | IATARPN--- | HDVLVVSIEV | NPAQFSPEED | 96  |
| sp P31663 PANC_ECOLI    | -----      | --RVALVPTM | GNLHDGHMKL | VDEAKAR--- | ADVVVVSIEV | NPMQFDRPED | 67  |
| sp P9WIL5 PANC_MYCTU    | -----      | --RVMLVPTM | GALHEGHLAL | VRAAKRV--P | GSVVVVSIEV | PMQFGAGED  | 78  |

|                         |            |            |            |            |            |             |     |
|-------------------------|------------|------------|------------|------------|------------|-------------|-----|
|                         | 910        | 920        | 930        | 940        | 950        | 960         |     |
| ETH_00031750            | .....      | .....      | .....      | .....      | .....      | .....       | 171 |
| Vbra_16581              | FDTYPIKVEE | DLHLLLTQ-- | TNAQVLELPE | ASEMYPHLAP | RRGAPAGAPG | GGPPVVGAP-- | 783 |
| Cvel_3471               | FDTYPMRLDE | DIAKLRDR-- | N-VEVIFETN | VQDIYP--TA | EDSF-----  | -----       | 933 |
| SN3_00101300            | FDTYPMDLQR | DVQMLEEA-- | G-VDVVFAPS | SEGVYS--DK | DAVF-----  | -----       | 472 |
| NCLIV_039640            | LLTYPASIDE | DIRLIQQL-- | GVVSVLEVP  | REALFP-LDA | PAGF---SAS | PGVTSASASS  | 215 |
| TGME49_265870           | FLTYPASIDD | DMKLLSQV-- | R-VDLVFI   | HSSLYP-LDS | RPHL---IAG | SEELYTVP--  | 230 |
| HHA_265870              | FLTYPASIDD | DMKLLSQV-- | R-VDLVFI   | HSSLYP-LDR | RPHL---IAG | SEVLSTIPAR  | 230 |
| XP_002768075.P. marinus | YEQYPRDLEG | DLKKLETESA | G-VDVVFAP  | PADMYP-KNP | RAIV-----  | -----       | 138 |
| XP_002767048.P. marinus | YEQYPRDLEG | DLKKLETESA | G-VDVVFAP  | PADMYP-KNP | RAIV-----  | -----       | 138 |
| sp P31663 PANC_ECOLI    | LARYPRTLQE | DCEKLNKR-- | K-VDLVFI   | VKEIYP-NGT | ETHT-----  | -----       | 107 |
| sp P9WIL5 PANC_MYCTU    | LDAVPRTPDD | DLAQLRAE-- | G-VEIAFET  | TAAMYD-DGL | RTTV-----  | -----       | 118 |

|     |     |     |      |      |      |
|-----|-----|-----|------|------|------|
| 970 | 980 | 990 | 1000 | 1010 | 1020 |
|-----|-----|-----|------|------|------|

|                         |            |             |             |            |            |            |     |
|-------------------------|------------|-------------|-------------|------------|------------|------------|-----|
| ETH_00031750            | GEGLAPGGRP | TAGGPPVGGAP | AQRRGVPPFAE | -----      | -----      | -----      | 201 |
| Vbra_16581              | -----      | -----       | -----       | -----      | -----      | -----      | 783 |
| Cvel_3471               | -----      | -----       | -----       | -----      | -----      | -----      | 933 |
| SN3_00101300            | EHGIRAGHLT | ACGERKESTS  | EEGRETASQD  | SETLVSVPPA | AAACHKTAAA | VGDSAGTVTP | 532 |
| NCLIV_039640            | -RGRDNG--- | --DARANGLP  | NATD----KE  | ADRVVRSVPS | GFKLERLDTH | AGERDA---- | 261 |
| TGME49_265870           | GRGLEDG--- | --GGRVTSQG  | SDDEADAMEE  | ADRVELSPVD | --RLNRGDAR | AREVDG---- | 279 |
| HHA_265870              | GRGLEDG--- | --GGRVTSQG  | SDDEADAMEE  | ADRVEVSPVD | --RLNRGDAR | GREVDG---- | 279 |
| XP_002768075.P. marinus | -----      | -----       | -----       | -----      | -----      | -----      | 138 |
| XP_002767048.P. marinus | -----      | -----       | -----       | -----      | -----      | -----      | 138 |
| sp P31663 PANC_ECOLI    | -----      | -----       | -----       | -----      | -----      | -----      | 107 |
| sp P9WIL5 PANC_MYCTU    | -----      | -----       | -----       | -----      | -----      | -----      | 118 |

|                         |            |            |            |            |            |            |     |
|-------------------------|------------|------------|------------|------------|------------|------------|-----|
|                         | 1030       | 1040       | 1050       | 1060       | 1070       | 1080       |     |
| ETH_00031750            | -----      | -----      | -----      | -----      | -----      | -----      | 201 |
| Vbra_16581              | -----      | -----      | -----      | -----      | -----      | -----      | 783 |
| Cvel_3471               | -----      | -----      | -----      | -----      | -----      | -----      | 933 |
| SN3_00101300            | SVKLEGSSEL | FLQGNDDGRL | PSKVAATLGS | VVYDKASPAR | SVLTATSTPT | AEESSAHEKG | 592 |
| NCLIV_039640            | -----      | -----      | -----      | ---LGPTPA- | ----ASWIP- | -----      | 272 |
| TGME49_265870           | -----      | -----      | -----      | ---DGCSHS- | ----A-WSP- | -----      | 289 |
| HHA_265870              | -----      | -----      | -----      | ---DDCSHS- | ----A-WSP- | -----      | 289 |
| XP_002768075.P. marinus | -----      | -----      | -----      | -----      | -----      | -----      | 138 |
| XP_002767048.P. marinus | -----      | -----      | -----      | -----      | -----      | -----      | 138 |
| sp P31663 PANC_ECOLI    | -----      | -----      | -----      | -----      | -----      | -----      | 107 |
| sp P9WIL5 PANC_MYCTU    | -----      | -----      | -----      | -----      | -----      | -----      | 118 |

|                         |            |            |              |            |            |            |     |
|-------------------------|------------|------------|--------------|------------|------------|------------|-----|
|                         | 1090       | 1100       | 1110         | 1120       | 1130       | 1140       |     |
| ETH_00031750            | -----      | -----      | -----        | -----      | -----      | -----      | 224 |
| Vbra_16581              | -----      | -----      | -----        | -----      | -----      | -----      | 823 |
| Cvel_3471               | -----      | -----      | -----        | -----      | -----      | -----      | 973 |
| SN3_00101300            | NSGRRRQOEK | PNSSGSSRLF | RMRVFFKDIE   | DVQCEGRRRR | GFFGGIGTVV | AQLLTLTRPT | 652 |
| NCLIV_039640            | -----      | ----PQRLF  | RMRVDFEGIE   | EVECEGRRRS | GFLRGIGTVV | TQLFTLIRPT | 317 |
| TGME49_265870           | -----      | ----PQRLF  | RMRVDFEGIE   | DVECEGRRRC | GFFRGIGTVV | QQLFTLIRPT | 334 |
| HHA_265870              | -----      | ----PQRLF  | RMRVDFEGIE   | DVECEGRRRC | GFFRGIGTVV | VQLFTLIRPT | 334 |
| XP_002768075.P. marinus | -----      | -----      | PSVTVEPNFV   | NGLSEAACRP | TFFRGVATVV | MKLFNIIRPE | 178 |
| XP_002767048.P. marinus | -----      | -----      | PSVTVEPNFV   | NGLSEAACRP | TFFRGVATVV | MKLFNIIRPE | 178 |
| sp P31663 PANC_ECOLI    | -----      | -----      | ----YVDVPGLS | TML-EGASRP | GHFRGVSTIV | SKLFLNVQPD | 144 |
| sp P9WIL5 PANC_MYCTU    | -----      | -----      | ----QPGL     | AAELEGGPRP | THFAGVLTVV | LKLLQIVRPD | 153 |

|                         |            |            |            |            |            |            |      |
|-------------------------|------------|------------|------------|------------|------------|------------|------|
|                         | 1150       | 1160       | 1170       | 1180       | 1190       | 1200       |      |
| ETH_00031750            | -----      | -----VS    | SGCIDTRVVL | CPTARG-PQC | LPFASRNKRL | TQQOLEKAOE | 265  |
| Vbra_16581              | VVVFQKDFL  | QTVIVRKLCA | EFFPDVEVAV | VPTVRE-KDC | LAFASRNARL | TPEERKRAPL | 882  |
| Cvel_3471               | VAIFGQKDFL | QTVVVKRLAR | EFFIDTEIVV | HETVRE-ESC | LATASRNEKL | TKEERHKAAG | 1032 |
| SN3_00101300            | YVHVGLKDFQ | QVICLRLVC  | GLGLDLVVA  | HSTKRHASDC | LSLSRRNKRL | SGAERTAAAK | 712  |
| NCLIV_039640            | YAHFGFKDFQ | QVACVKRLIC | GMGLDALLA  | HNTWRD-SDC | MAASSRNRRM | TEEDRKKARK | 376  |
| TGME49_265870           | YAHCGFKDFQ | QVACLKRLIC | GMGLDALLA  | HNTWRD-SDC | VAASSRNRRM | AEADRQKARK | 393  |
| HHA_265870              | YAHCGFKDFQ | QVACLKRLIC | GMGLDALLA  | HNTWRD-SDC | VAASSRNRRM | AEADRQKARK | 393  |
| XP_002768075.P. marinus | RAYFGQKDM  | QVSVIISMVK | DLNVPVELEV | VPTARE-ADC | LASSSRNVYL | TPAMREKATI | 237  |
| XP_002767048.P. marinus | RAYFGQKDM  | QVSVIISMVK | DLNVPVELEV | VPTARE-ADC | LASSSRNVYL | TPAMREKATI | 237  |
| sp P31663 PANC_ECOLI    | IACFGEKDFQ | QLALIRKVA  | DMGFIEIVG  | VPIMRA-KDC | LALSSRNRYL | TAEQRKIAPG | 203  |
| sp P9WIL5 PANC_MYCTU    | RVFFGEIDYQ | LVLIRQLVA  | DFNLDAVAVG | VPTVRE-ADC | LAMSSRNRYL | DPAQRAAAVA | 212  |

|                         |             |            |            |            |            |             |      |
|-------------------------|-------------|------------|------------|------------|------------|-------------|------|
|                         | 1210        | 1220       | 1230       | 1240       | 1250       | 1260        |      |
| ETH_00031750            | -----       | -----      | -----      | -----      | -----      | -----       | 320  |
| Vbra_16581              | ACAVLKEVEA  | LYNKGTR-QI | GALRAAA--- | AAAERVG-A  | HLEYLAFNRQ | ADGAPIVPLG  | 320  |
| Cvel_3471               | IYQTLQAVEA  | QHRRGER-DA | GVLTEAG--- | RVFAASHG-L | SVDYITVCDL | YTGKAADVLO  | 937  |
| SN3_00101300            | LFASLSLVKD  | AVESGEVTSV | SDLISLG--- | LTALKKRE-M | HMDYLILSDL | ESGRELQEDE  | 1088 |
| NCLIV_039640            | YYSVLQVQCR  | SYERGER-RV | QOLETEA--- | RLHAAAAG-L | HLYYITFNRW | QDGAPVAYTS  | 767  |
| TGME49_265870           | SFLLLQHVSR  | -----ER-   | -----      | -----      | -----      | -----       | 388  |
| HHA_265870              | SFLLLQHVGE  | VFRKGER-RV | HRLLEEA--- | RAFAEKEN-L | LLHYTAIDRL | EDGEPPVYRH  | 448  |
| XP_002768075.P. marinus | SFLLLQHVGE  | VFRKGER-RV | HTLLEEA--- | RAFAEKEN-L | LLHYTAIDRL | EDGEPPVYRH  | 448  |
| XP_002767048.P. marinus | LYKSLCAAAYD | MVKSASK-PV | KASEVEDVVK | RTLLAEPMVL | GIEYISVASV | ETAQEVETIQ  | 296  |
| sp P31663 PANC_ECOLI    | LYKSLCAAAYD | MVKSASK-PV | KASEVEDVVK | RTLLAEPMVL | GIEYISVASV | ETAQEVETIQ  | 296  |
| sp P9WIL5 PANC_MYCTU    | LYKVISSIAD  | KLQAGER-DL | DEIITIA--- | GOELNEKG-F | RADDIQIRDA | D'ILLEVSETS | 258  |
| sp P9WIL5 PANC_MYCTU    | LSAALTAAAH  | AATAGAQ--- | -AALDAA--- | RAVLDAAPGV | AVDYLELRDI | GLG-PMPLNG  | 264  |

|               |            |            |            |            |            |            |      |
|---------------|------------|------------|------------|------------|------------|------------|------|
|               | 1270       | 1280       | 1290       | 1300       | 1310       | 1320       |      |
| ETH_00031750  | -----      | -----      | -----      | -----      | -----      | -----      | 337  |
| Vbra_16581    | APRGAPRR-- | -----      | -----      | -----      | -----      | -----      | 939  |
| Cvel_3471     | PT-----    | -----      | -----      | -----      | -----      | -----      | 1096 |
| SN3_00101300  | EVCPGAAL-- | -----      | -----      | -----      | -----      | -----      | 827  |
| NCLIV_039640  | GSSWTRKTPS | CCSATSNTTD | SVAPASCSSL | GANQQEHTRQ | QEQAQQQLA  | RRKEDAEAQT | 388  |
| TGME49_265870 | SGGAVKRIET | QGESAEN--- | -----      | --EERRAKRR | RTESDIADET | PLGRPGTGSF | 493  |

|                         |            |            |       |            |          |               |     |
|-------------------------|------------|------------|-------|------------|----------|---------------|-----|
| HHA_265870              | SGGAVKRIDT | HRESAAN--- | ----- | --GERRAKRR | RTDSDIAD | EA QIGRPGTGSP | 493 |
| XP_002768075.P. marinus | FGPEA----  | -----      | ----- | -----      | -----    | -----         | 301 |
| XP_002767048.P. marinus | FGPEA----  | -----      | ----- | -----      | -----    | -----         | 301 |
| sp P31663 PANC_ECOLI    | -----      | -----      | ----- | -----      | -----    | -----         | 258 |
| sp P9WIL5 PANC_MYCTU    | SGR-----   | -----      | ----- | -----      | -----    | -----         | 267 |

|                         |            |            |            |            |            |             |      |
|-------------------------|------------|------------|------------|------------|------------|-------------|------|
|                         | 1330       | 1340       | 1350       | 1360       | 1370       | 1380        |      |
| ETH_00031750            | PNVDPTGGPT | GAPRRAPCEA | PEGPPQGDEG | SLPEN-DQIC | VAVAIR-MAP | GCSIVDNFVL  | 395  |
| Vbra_16581              | -----      | -----      | -----      | -----KSYC  | VAIGAS-VGP | SCRLLVDNIVL | 962  |
| Cvel_3471               | -----      | -CLHAGGSVK | VSKP-----  | -----V     | LLPSGT-PRE | RVRLVDNVVI  | 1129 |
| SN3_00101300            | SRLQPEGEAN | HERKVDGCEQ | QQEDKEGVEE | RLLESPGKYC | CTVAVR-GNA | DITLVDNVTL  | 886  |
| NCLIV_039640            | -----      | -----      | -----      | -----      | -----R-ANP | -----       | 392  |
| TGME49_265870           | SSYKRGHGLK | GELHANGSSR | SSSPADTADM | ILLDS-GRYC | LTVAVR-GNP | LTTVVDSVFL  | 551  |
| HHA_265870              | SSYKRGHGLK | GELHANGSSH | SSSPADTADM | ILLDS-GRYC | LTVAVR-GNP | LTTVVDSVVL  | 551  |
| XP_002768075.P. marinus | -----      | -----      | -----      | -----EPVL  | VAIAVKYGA  | NLRLIDNMWM  | 325  |
| XP_002767048.P. marinus | -----      | -----      | -----      | -----EPVL  | VAIAVKYGA  | NLRLIDNMWM  | 325  |
| sp P31663 PANC_ECOLI    | -----      | -----      | -----      | -----KRAV  | ILVAAW-LGD | -ARLIDNKMV  | 280  |
| sp P9WIL5 PANC_MYCTU    | -----      | -----      | -----      | -----      | LLVAAR-LGT | -TRLLDNIAI  | 285  |

|                         |            |            |            |            |            |            |      |
|-------------------------|------------|------------|------------|------------|------------|------------|------|
|                         | 1390       | 1400       | 1410       | 1420       | 1430       | 1440       |      |
| ETH_00031750            | SDTHKFGDLL | PPVPNSAEAV | PSAAAALLPL | HAAPCVLLLR | SLSLQLLQKS | PPAAAAA    | 455  |
| Vbra_16581              | EAPKG-DSAQ | QRQQQSGWMA | SWLGAGK--- | -----      | -----      | -----      | 988  |
| Cvel_3471               | RVP-----   | -----      | -----      | -----      | -----      | -----      | 1132 |
| SN3_00101300            | TDQPQCGDLL | PPPLNVWGR  | NSAAAKHSFF | ---GSFLVLA | SLGMHLRYLN | EDVDLLLOA  | 943  |
| NCLIV_039640            | -----      | -----      | -----      | -----      | -----      | -----      | 392  |
| TGME49_265870           | IPNNR-EDLL | PPLFNTPWDH | HCVEPKYACL | ---PSFLVFS | SFGFHLRPLR | PSDLKLVAAA | 607  |
| HHA_265870              | IPNNR-EDLL | PPLFNTPWDH | HCVEPKYACL | ---PSFLLFS | SFGFHLRPLR | PSDLKLVVAA | 607  |
| XP_002768075.P. marinus | DNQKHA---- | -----      | -----      | -----      | -----      | -----      | 331  |
| XP_002767048.P. marinus | DNQKHA---- | -----      | -----      | -----      | -----      | -----      | 331  |
| sp P31663 PANC_ECOLI    | ELA-----   | -----      | -----      | -----      | -----      | -----      | 283  |
| sp P9WIL5 PANC_MYCTU    | EIGTFAGTDR | PDGYRAILES | HWRN-----  | -----      | -----      | -----      | 309  |

|                         |            |            |            |            |           |            |      |
|-------------------------|------------|------------|------------|------------|-----------|------------|------|
|                         | 1450       | 1460       | 1470       | 1480       | 1490      | 1500       |      |
| ETH_00031750            | AEWAQTVEE- | -----      | -----      | -----      | -----     | -----      | 464  |
| Vbra_16581              | -----      | -----      | -----      | -----      | -----     | -----      | 988  |
| Cvel_3471               | -----      | -----      | -----      | -----      | -----     | -----      | 1132 |
| SN3_00101300            | EEEDMEPRQN | GFRLLLPPLS | PAVGATAACQ | RQTEGEKNLG | CSTRQQPVA | AGPGTETREP | 1003 |
| NCLIV_039640            | -----      | -----      | -----      | -----      | -----     | -----      | 392  |
| TGME49_265870           | EQEDARVES- | -----      | -----      | -----      | -----     | -----      | 616  |
| HHA_265870              | EQEDARVES- | -----      | -----      | -----      | -----     | -----      | 616  |
| XP_002768075.P. marinus | -----      | -----      | -----      | -----      | -----     | -----      | 331  |
| XP_002767048.P. marinus | -----      | -----      | -----      | -----      | -----     | -----      | 331  |
| sp P31663 PANC_ECOLI    | -----      | -----      | -----      | -----      | -----     | -----      | 283  |
| sp P9WIL5 PANC_MYCTU    | -----      | -----      | -----      | -----      | -----     | -----      | 309  |

|                         |            |            |            |            |            |             |      |
|-------------------------|------------|------------|------------|------------|------------|-------------|------|
|                         | 1510       | 1520       | 1530       | 1540       | 1550       | 1560        |      |
| ETH_00031750            | -----      | -----      | -----      | -----      | -----LE    | ALELSDPVVS  | 476  |
| Vbra_16581              | -----      | -----      | -----      | -----      | -----      | -----       | 988  |
| Cvel_3471               | -----      | -----      | -----      | -----      | -----      | -----       | 1132 |
| SN3_00101300            | LLQQQORIGV | CEGTRARTGE | RMHILRWLQQ | QRRTLFEVEA | AGTRKTLWMK | KQGD TAAAGA | 1063 |
| NCLIV_039640            | -----      | -----      | -----      | -----      | -----      | -----       | 392  |
| TGME49_265870           | -----      | -----      | -----      | -----      | -----Q     | QSAKSAGVAA  | 627  |
| HHA_265870              | -----      | -----      | -----      | -----      | -----Q     | QSAKSTGADA  | 627  |
| XP_002768075.P. marinus | -----      | -----      | -----      | -----      | -----      | -----       | 331  |
| XP_002767048.P. marinus | -----      | -----      | -----      | -----      | -----      | -----       | 331  |
| sp P31663 PANC_ECOLI    | -----      | -----      | -----      | -----      | -----      | -----       | 283  |
| sp P9WIL5 PANC_MYCTU    | -----      | -----      | -----      | -----      | -----      | -----       | 309  |

|                         |            |            |            |            |            |            |      |
|-------------------------|------------|------------|------------|------------|------------|------------|------|
|                         | 1570       | 1580       | 1590       | 1600       | 1610       | 1620       |      |
| ETH_00031750            | SLSSAERQKA | WPWASAAAA  | AAAP-----  | -----      | -----      | -----      | 500  |
| Vbra_16581              | -----      | -----      | -----      | -----      | -----      | -----      | 988  |
| Cvel_3471               | -----      | -----      | -----      | -----      | -----      | -----      | 1132 |
| SN3_00101300            | AEQSCVRPCA | QQSSQVHSPA | TSGSGSTFQN | SSNVCRVRAV | GLFKYDLME  | CSSSSNETAR | 1123 |
| NCLIV_039640            | -----      | -----      | -----      | -----      | -----      | -----      | 392  |
| TGME49_265870           | PETCCTRTFT | WMHAGALSPT | STHD-----  | -----VWAL  | GLFKRRL--- | -----      | 662  |
| HHA_265870              | PETCCTRTFT | WMHAGALSPT | STHD-----  | -----VWAL  | GLFKRRL--- | -----      | 662  |
| XP_002768075.P. marinus | -----      | -----      | -----      | -----      | -----      | -----      | 331  |
| XP_002767048.P. marinus | -----      | -----      | -----      | -----      | -----      | -----      | 331  |
| sp P31663 PANC_ECOLI    | -----      | -----      | -----      | -----      | -----      | -----      | 283  |
| sp P9WIL5 PANC_MYCTU    | -----      | -----      | -----      | -----      | -----      | -----      | 309  |

1630 1640 1650 1660 1670 1680

|                         |                                                                   |      |
|-------------------------|-------------------------------------------------------------------|------|
| ETH_00031750            | ..... ..... ..... ..... ..... ..... ..... .....                   | 500  |
| Vbra_16581              | ----- ----- ----- ----- ----- ----- ----- -----                   | 988  |
| Cvel_3471               | ----- ----- ----- ----- ----- ----- ----- -----                   | 1132 |
| SN3_00101300            | LTSHCSDRAA LEADRISVAS RGGADASIQS KDTRRREGRH VAAVGDTSAN RTALHSGGRT | 1183 |
| NCLIV_039640            | ----- ----- ----- ----- ----- ----- ----- -----                   | 392  |
| TGME49_265870           | ----- ----- ----- ----- ----- ----- ----- -----                   | 677  |
| HHA_265870              | ----- ----- ----- ----- ----- ----- ----- -----                   | 677  |
| XP_002768075.P. marinus | ----- ----- ----- ----- ----- ----- ----- -----                   | 331  |
| XP_002767048.P. marinus | ----- ----- ----- ----- ----- ----- ----- -----                   | 331  |
| sp P31663 PANC_ECOLI    | ----- ----- ----- ----- ----- ----- ----- -----                   | 283  |
| sp P9WIL5 PANC_MYCTU    | ----- ----- ----- ----- ----- ----- ----- -----                   | 309  |

|                         |                                                                  |      |      |      |      |      |      |
|-------------------------|------------------------------------------------------------------|------|------|------|------|------|------|
|                         | 1690                                                             | 1700 | 1710 | 1720 | 1730 | 1740 |      |
| ETH_00031750            | ..... ..... ..... ..... ..... ..... ..... .....                  |      |      |      |      |      | 518  |
| Vbra_16581              | ----- ----- ----- ----- ----- ----- ----- -----                  |      |      |      |      |      | 988  |
| Cvel_3471               | ----- ----- ----- ----- ----- ----- ----- -----                  |      |      |      |      |      | 1132 |
| SN3_00101300            | PAERDTCLSG AADRCSDSGN PRETTAKSGR FKRRERLIGY VWAEYAGEE QGGPPQKRER |      |      |      |      |      | 1243 |
| NCLIV_039640            | ----- ----- ----- ----- ----- ----- ----- -----                  |      |      |      |      |      | 392  |
| TGME49_265870           | PDGNEV---                                                        | ---  | ---  | ---  | ---  | ---  | 693  |
| HHA_265870              | PDGNEV---                                                        | ---  | ---  | ---  | ---  | ---  | 693  |
| XP_002768075.P. marinus | ----- ----- ----- ----- ----- ----- ----- -----                  |      |      |      |      |      | 331  |
| XP_002767048.P. marinus | ----- ----- ----- ----- ----- ----- ----- -----                  |      |      |      |      |      | 331  |
| sp P31663 PANC_ECOLI    | ----- ----- ----- ----- ----- ----- ----- -----                  |      |      |      |      |      | 283  |
| sp P9WIL5 PANC_MYCTU    | ----- ----- ----- ----- ----- ----- ----- -----                  |      |      |      |      |      | 309  |

|                         |                                                                   |      |      |      |      |      |      |
|-------------------------|-------------------------------------------------------------------|------|------|------|------|------|------|
|                         | 1750                                                              | 1760 | 1770 | 1780 | 1790 | 1800 |      |
| ETH_00031750            | ..... ..... ..... ..... ..... ..... ..... .....                   |      |      |      |      |      | 578  |
| Vbra_16581              | ----- ----- ----- ----- ----- ----- ----- -----                   |      |      |      |      |      | 988  |
| Cvel_3471               | ----- ----- ----- ----- ----- ----- ----- -----                   |      |      |      |      |      | 1132 |
| SN3_00101300            | KEGCSASGNV CRVLRVNRVF LKRERRRQTL GTHLLRAFIA ATYKOLLEEQ QQAVSVAPRH |      |      |      |      |      | 1303 |
| NCLIV_039640            | ----- ----- ----- ----- ----- ----- ----- -----                   |      |      |      |      |      | 392  |
| TGME49_265870           | TPRAAAAAGG ASPWRLLRRGF ITRARRRRTF GTHLLKAFLA TLYKEKVSSS RTA-----  |      |      |      |      |      | 746  |
| HHA_265870              | TPRAAAAAGG ASPWRLLRRGF ITRARRRRTF GTHLLKAFLA TLYREKVSSN RTA-----  |      |      |      |      |      | 746  |
| XP_002768075.P. marinus | ----- ----- ----- ----- ----- ----- ----- -----                   |      |      |      |      |      | 331  |
| XP_002767048.P. marinus | ----- ----- ----- ----- ----- ----- ----- -----                   |      |      |      |      |      | 331  |
| sp P31663 PANC_ECOLI    | ----- ----- ----- ----- ----- ----- ----- -----                   |      |      |      |      |      | 283  |
| sp P9WIL5 PANC_MYCTU    | ----- ----- ----- ----- ----- ----- ----- -----                   |      |      |      |      |      | 309  |

|                         |                                                                   |      |      |      |      |      |      |
|-------------------------|-------------------------------------------------------------------|------|------|------|------|------|------|
|                         | 1810                                                              | 1820 | 1830 | 1840 | 1850 | 1860 |      |
| ETH_00031750            | ..... ..... ..... ..... ..... ..... ..... .....                   |      |      |      |      |      | 578  |
| Vbra_16581              | ----- ----- ----- ----- ----- ----- ----- -----                   |      |      |      |      |      | 988  |
| Cvel_3471               | ----- ----- ----- ----- ----- ----- ----- -----                   |      |      |      |      |      | 1132 |
| SN3_00101300            | HRPPSAPVLH QRQQQEAVLK TAGHTGPTVK GRPQECEDRE AVVCKIRRTE EEQEMQEDAI |      |      |      |      |      | 1363 |
| NCLIV_039640            | ----- ----- ----- ----- ----- ----- ----- -----                   |      |      |      |      |      | 392  |
| TGME49_265870           | ----- ----- ----- ----- ----- ----- ----- -----                   |      |      |      |      |      | 746  |
| HHA_265870              | ----- ----- ----- ----- ----- ----- ----- -----                   |      |      |      |      |      | 746  |
| XP_002768075.P. marinus | ----- ----- ----- ----- ----- ----- ----- -----                   |      |      |      |      |      | 331  |
| XP_002767048.P. marinus | ----- ----- ----- ----- ----- ----- ----- -----                   |      |      |      |      |      | 331  |
| sp P31663 PANC_ECOLI    | ----- ----- ----- ----- ----- ----- ----- -----                   |      |      |      |      |      | 283  |
| sp P9WIL5 PANC_MYCTU    | ----- ----- ----- ----- ----- ----- ----- -----                   |      |      |      |      |      | 309  |

|                         |                                                                 |       |       |       |       |       |      |
|-------------------------|-----------------------------------------------------------------|-------|-------|-------|-------|-------|------|
|                         | 1870                                                            | 1880  | 1890  | 1900  | 1910  | 1920  |      |
| ETH_00031750            | ..... ..... ..... ..... ..... ..... ..... .....                 |       |       |       |       |       | 585  |
| Vbra_16581              | ----- ----- ----- ----- ----- ----- ----- -----                 |       |       |       |       |       | 988  |
| Cvel_3471               | ----- ----- ----- ----- ----- ----- ----- -----                 |       |       |       |       |       | 1132 |
| SN3_00101300            | TEATETRKS ERGKLETLCV EGTESTLEG GATEGKEWKK SKHEMEGEIS CTVQLENVPH |       |       |       |       |       | 1423 |
| NCLIV_039640            | ----- ----- ----- ----- ----- ----- ----- -----                 |       |       |       |       |       | 392  |
| TGME49_265870           | -----SR EV-----                                                 | ----- | ----- | ----- | ----- | ----- | 757  |
| HHA_265870              | -----SR EV-----                                                 | ----- | ----- | ----- | ----- | ----- | 757  |
| XP_002768075.P. marinus | ----- ----- ----- ----- ----- ----- ----- -----                 |       |       |       |       |       | 331  |
| XP_002767048.P. marinus | ----- ----- ----- ----- ----- ----- ----- -----                 |       |       |       |       |       | 331  |
| sp P31663 PANC_ECOLI    | ----- ----- ----- ----- ----- ----- ----- -----                 |       |       |       |       |       | 283  |
| sp P9WIL5 PANC_MYCTU    | ----- ----- ----- ----- ----- ----- ----- -----                 |       |       |       |       |       | 309  |

|               |                                                           |            |            |            |      |      |
|---------------|-----------------------------------------------------------|------------|------------|------------|------|------|
|               | 1930                                                      | 1940       | 1950       | 1960       | 1970 |      |
| ETH_00031750  | ..... ..... ..... ..... ..... ..... ..... .....           |            |            |            |      | 638  |
| Vbra_16581    | ----- ----- ----- ----- ----- ----- ----- -----           |            |            |            |      | 988  |
| Cvel_3471     | ----- ----- ----- ----- ----- ----- ----- -----           |            |            |            |      | 1132 |
| SN3_00101300  | YLVGVLREGG FCVDTAAAET TRAQTYKGS CCMHVSLAQW YNAFVLNANV --- |            |            |            |      | 1473 |
| NCLIV_039640  | ----- ----- ----- ----- ----- ----- ----- -----           |            |            |            |      | 392  |
| TGME49_265870 | WLAPAVSECG FSL-----                                       | LDSTNLSSGE | CRLHLNLDKW | FRTYVTDLRL | ---  | 800  |
